# Supplementary material for: Design, synthesis, and evaluation of novel coumarin-dithiocarbamate derivatives (IDs) as anti-colorectal cancer agents
Source: PubMed Central journal article supplement (PMC8759731; doi:10.1080/14756366.2021.1875458), 2021-02-08

**Supplementary Information**

**Design, synthesis, and evaluation of novel  
coumarin-dithiocarbamate derivatives (IDs) as  
anti-colorectal cancer agents**

Heping Zhu<sup>a</sup>, Shilong Ying<sup>b</sup>, Bingluo Zhou<sup>b</sup>, Xinyang Hu<sup>b</sup>, Xiao Liang<sup>a</sup>, Wangyu Li<sup>a</sup>,  
Dungai Wang<sup>a</sup>, Hongchuan Jin<sup>\*,b</sup>, Yuanjiang Pan<sup>\*,a</sup>

<sup>a</sup> Department of Chemistry, Zhejiang University, Hangzhou 310027, P. R. China

<sup>b</sup> Laboratory of Cancer Biology, Key Lab of Biotherapy in Zhejiang, Sir Run Run Shaw Hospital, Medical School of Zhejiang University, Hangzhou 310020, P. R. China

**Corresponding authors:**

E-mail address: panyuanjiang@zju.edu.cn (YJ. Pan)

E-mail address: jinhc@zju.edu.cn (HC. Jin)

**Contents**

<sup>1</sup>H NMR, <sup>13</sup>C NMR and HRMS spectra of compounds  
**ID-1~ID-20.....S2-S25**

<sup>1</sup>H NMR, CDCl<sub>3</sub> (Bruker AVANCE III 400) (ID-1)

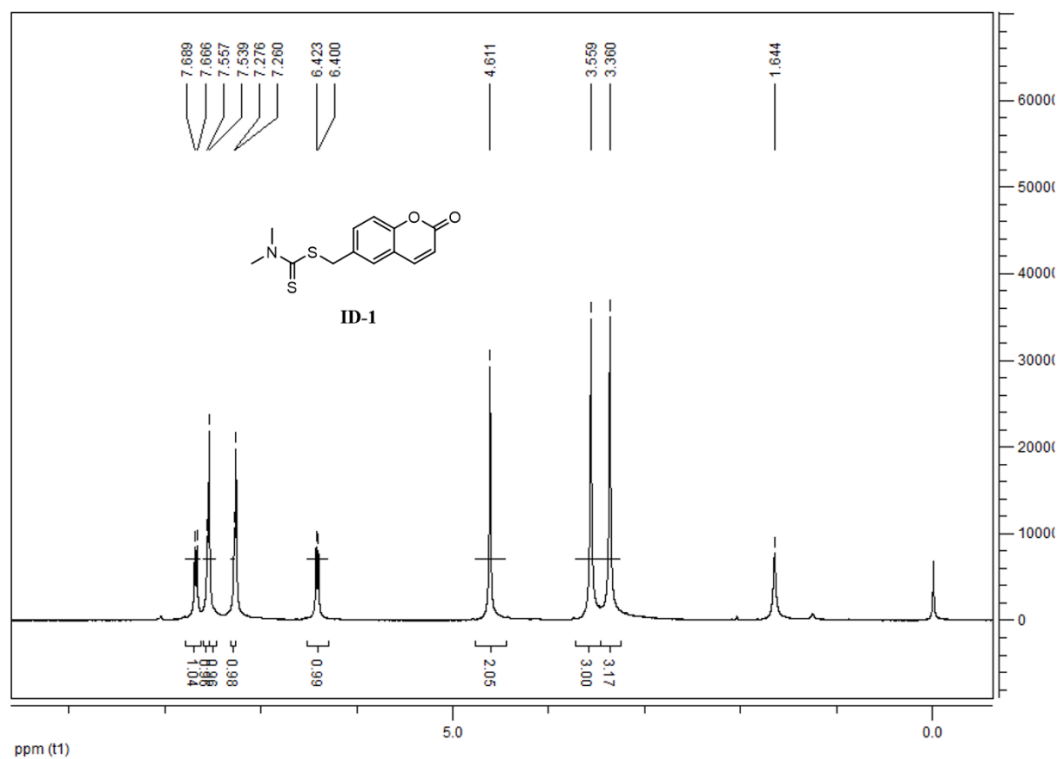

<sup>13</sup>C NMR, CDCl<sub>3</sub> (Bruker AVANCE III 400) (ID-1)

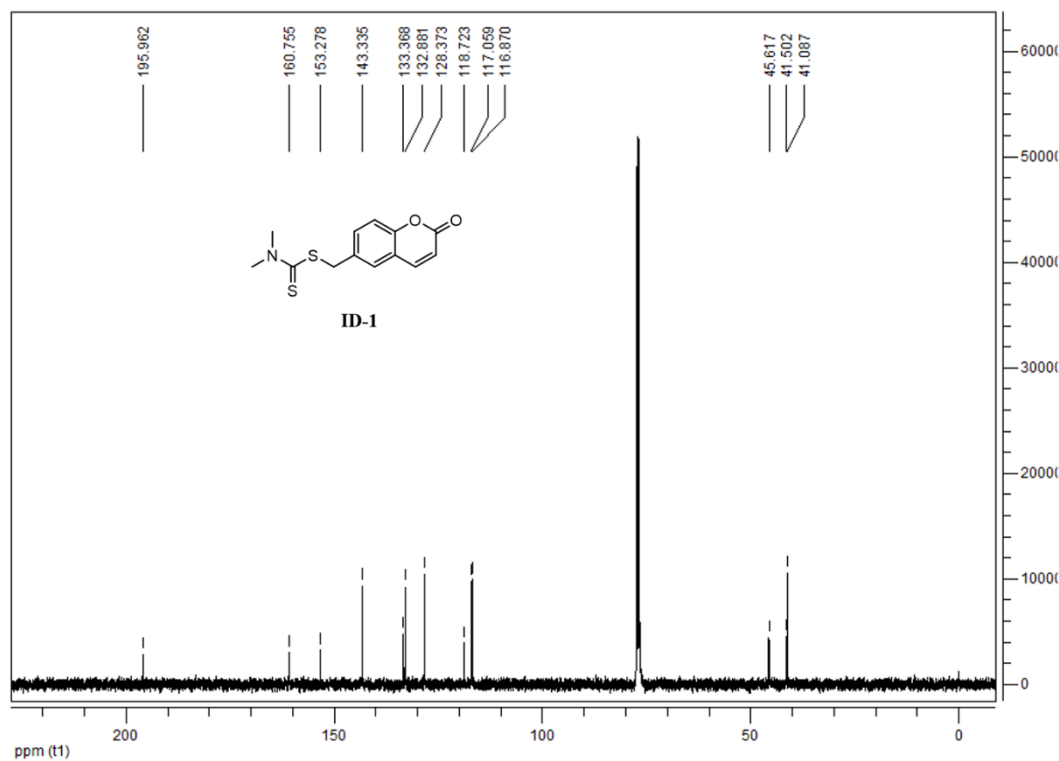

$^1\text{H}$  NMR, DMSO- $d_6$  (Bruker AVANCE III 400) (**ID-2**)

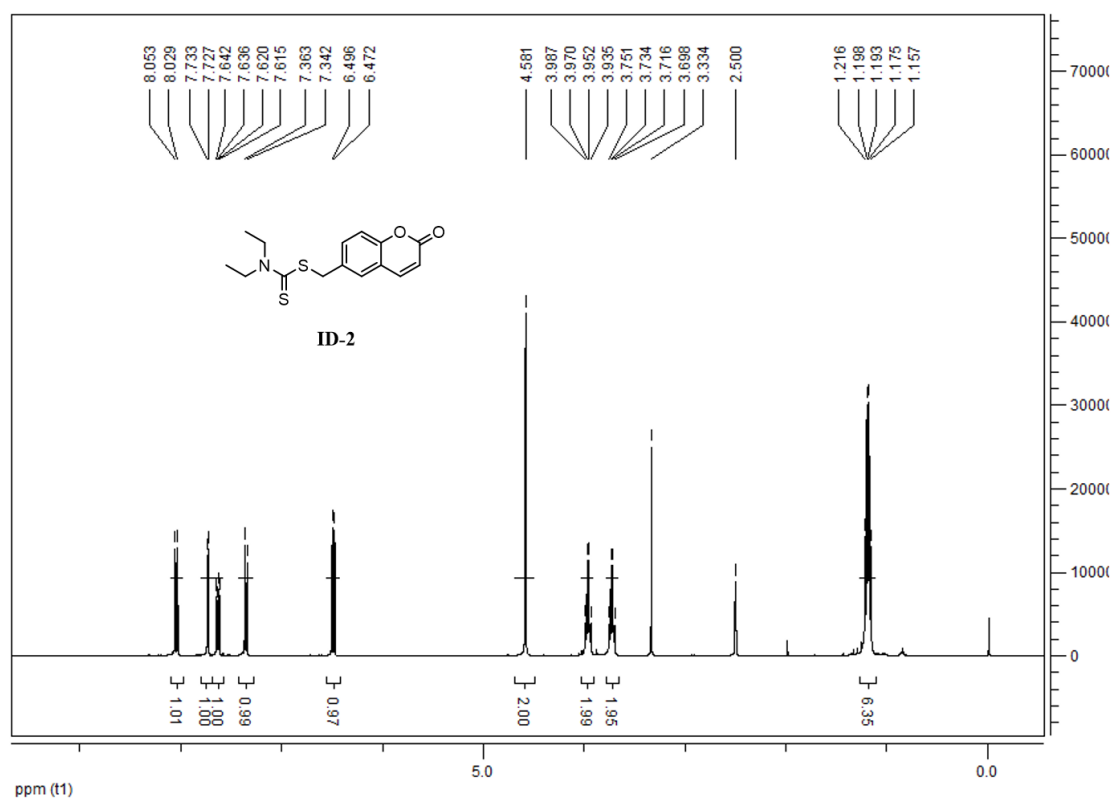

$^{13}\text{C}$  NMR, DMSO- $d_6$  (Bruker AVANCE III 400) (**ID-2**)

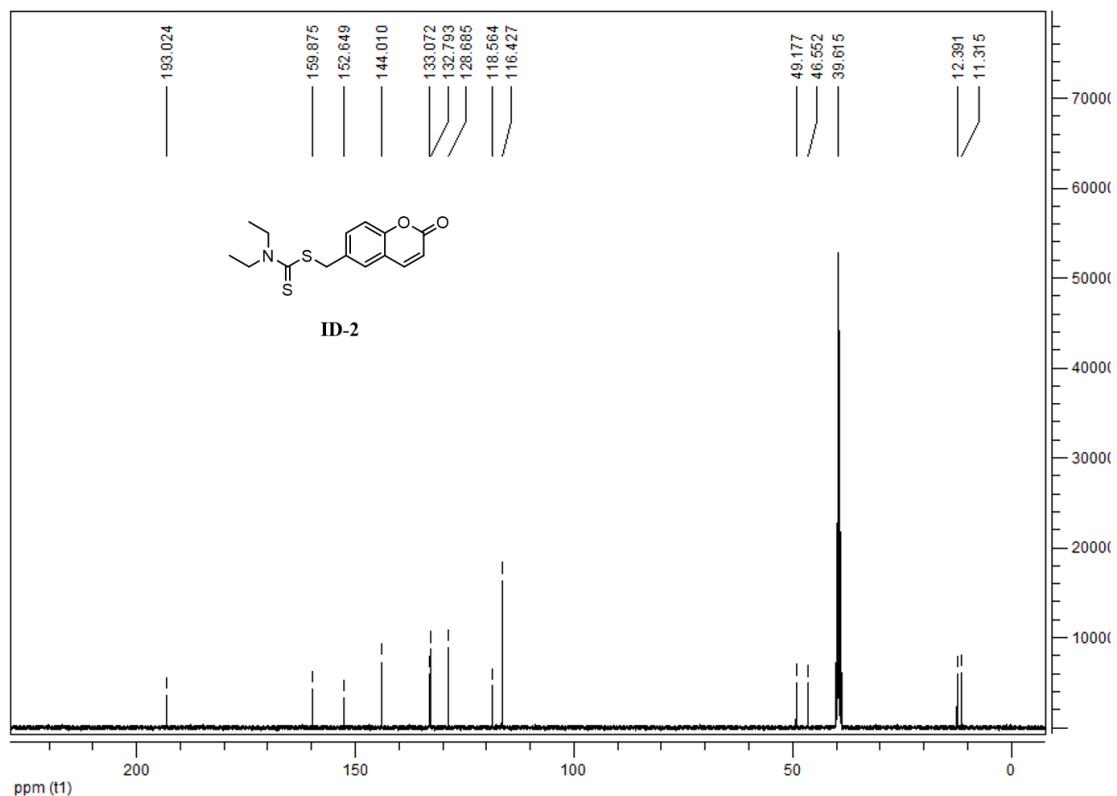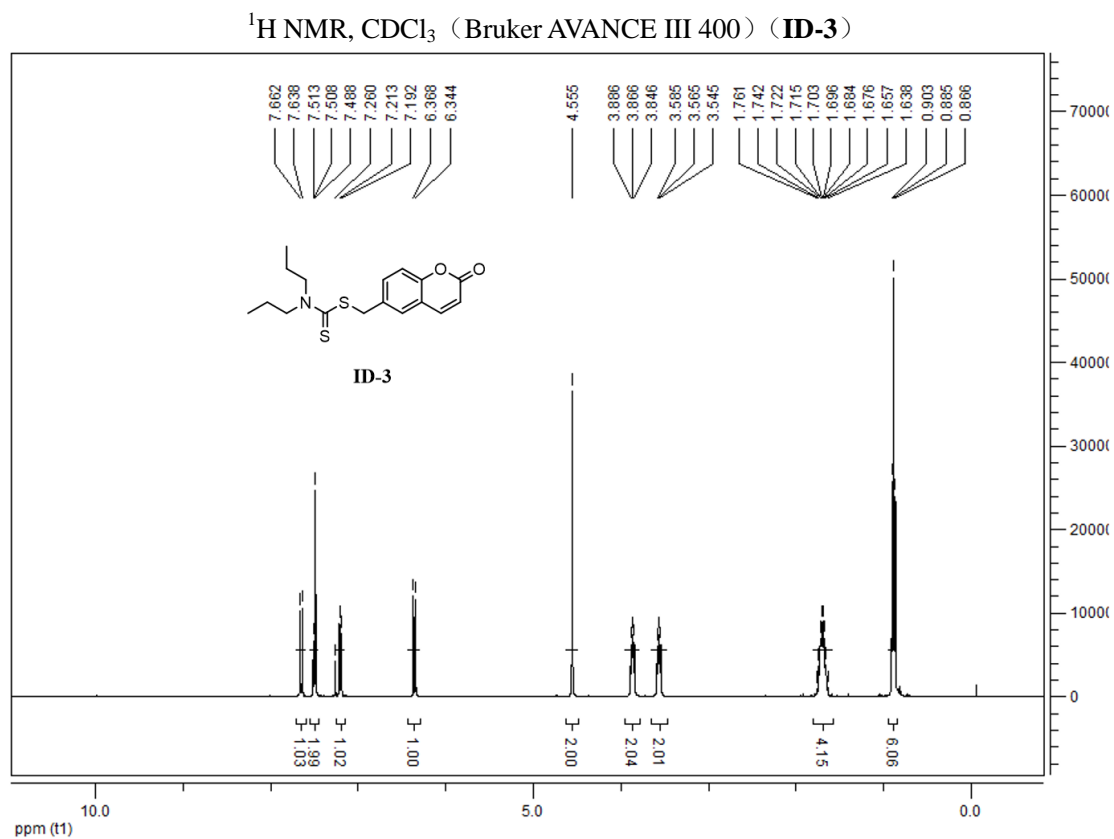

**13C NMR, CDCl<sub>3</sub> (Bruker AVANCE III 400) (ID-3)**

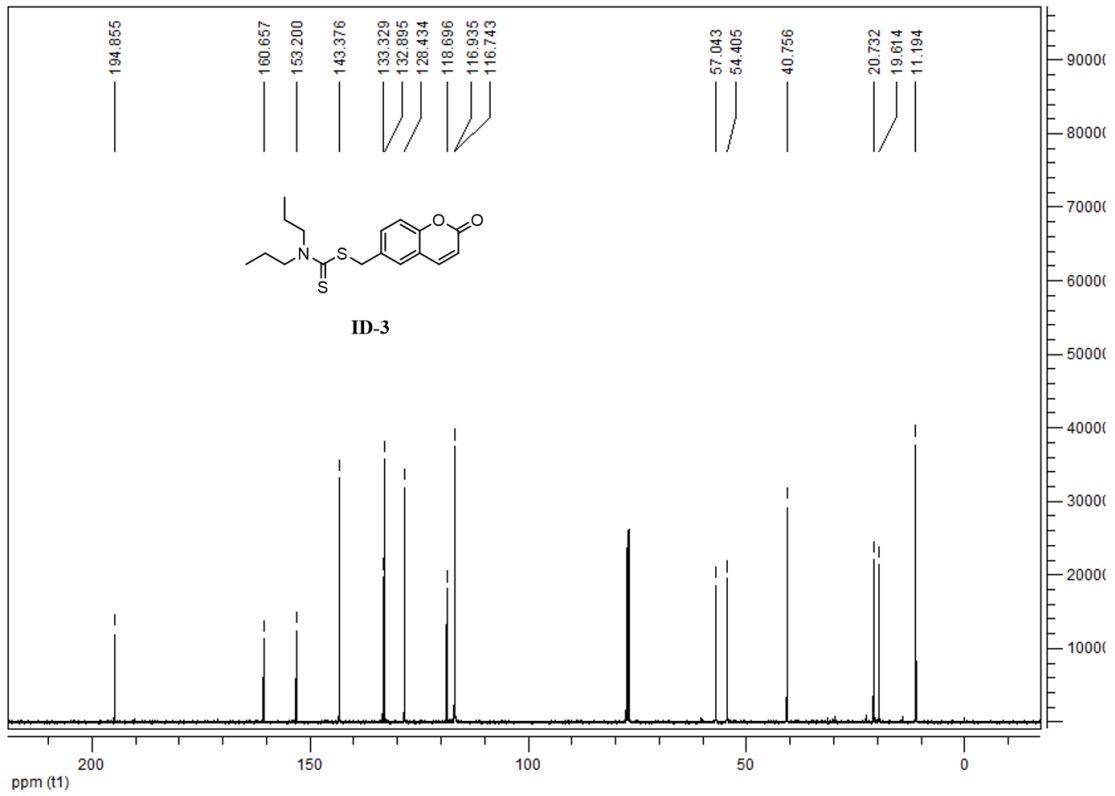

<sup>1</sup>H NMR, CDCl<sub>3</sub> (Bruker AVANCE III 400) (**ID-4**)

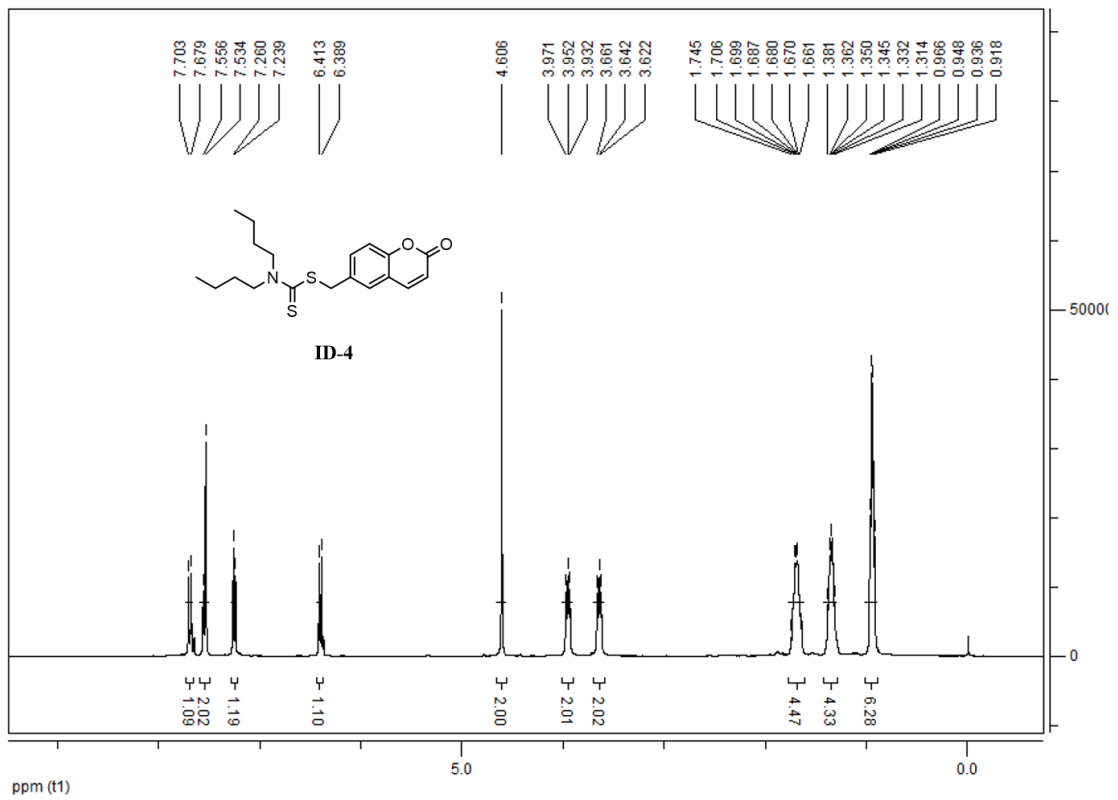

<sup>13</sup>C NMR, CDCl<sub>3</sub> (Bruker AVANCE III 400) (ID-4)

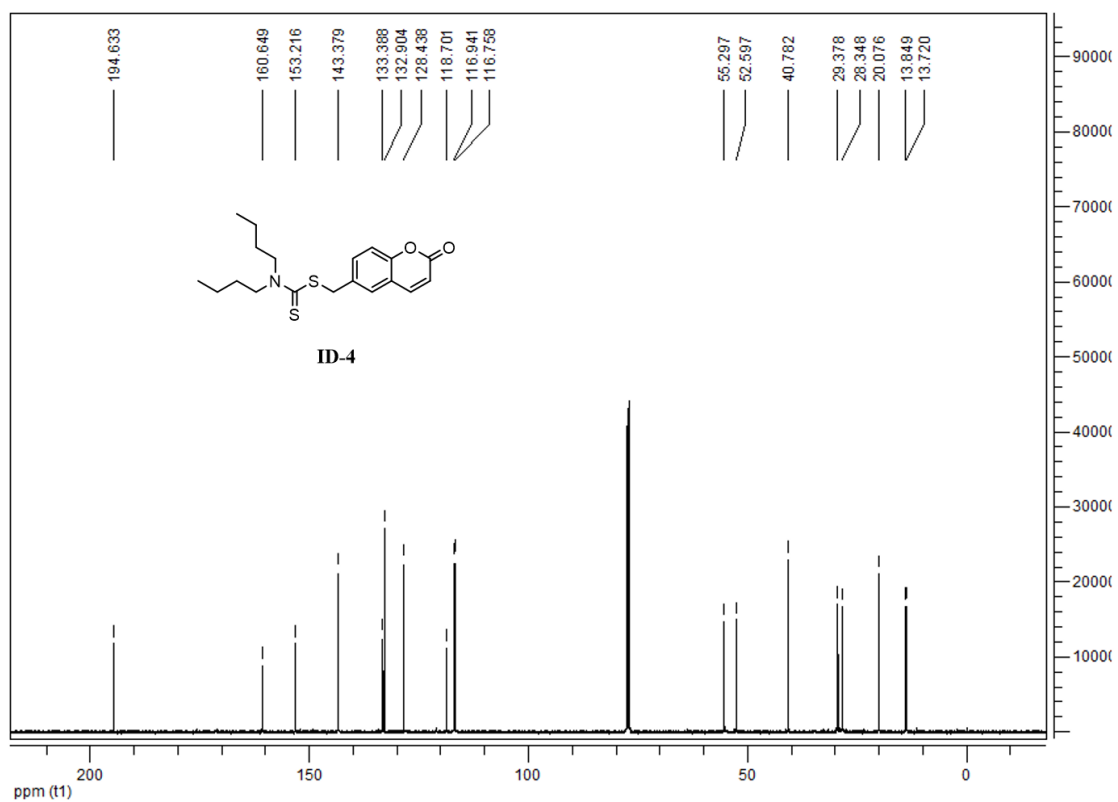

<sup>1</sup>H NMR, CDCl<sub>3</sub> (Bruker AVANCE III 400) (ID-5)

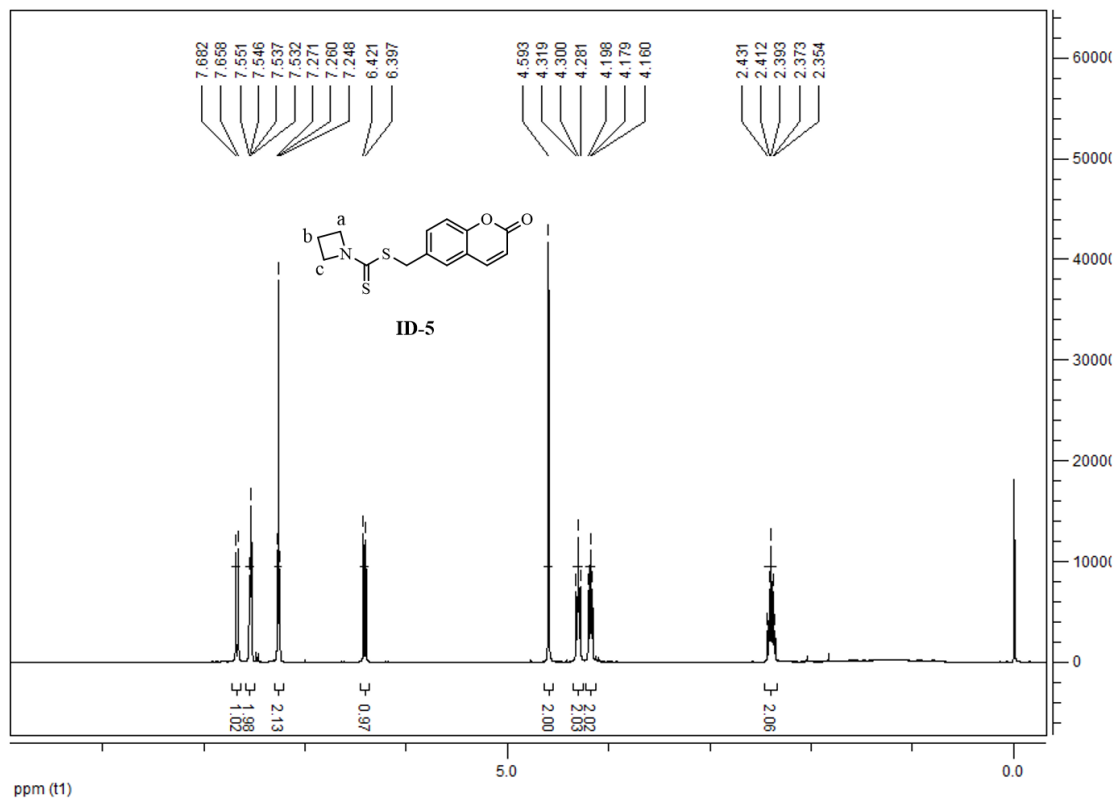

$^{13}\text{C}$  NMR,  $\text{CDCl}_3$  (Bruker AVANCE III 400) (**ID-5**)

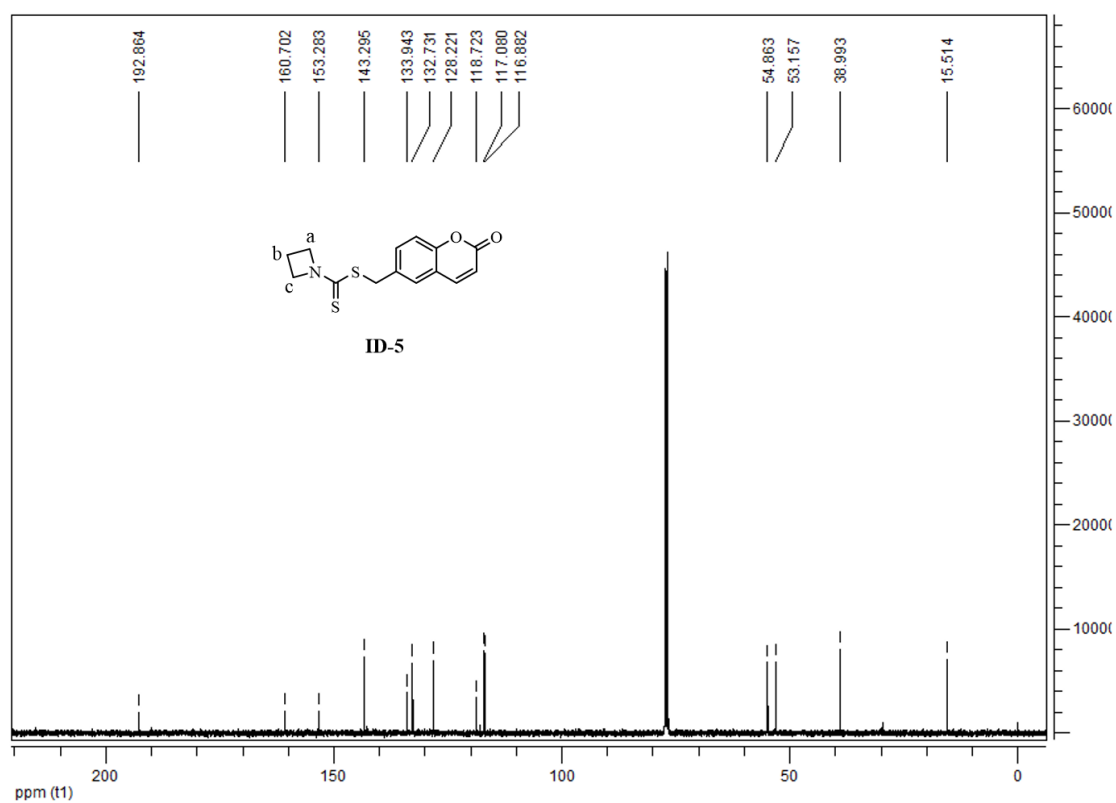

$^1\text{H}$  NMR,  $\text{DMSO}-d_6$  (Bruker AVANCE III 400) (**ID-6**)

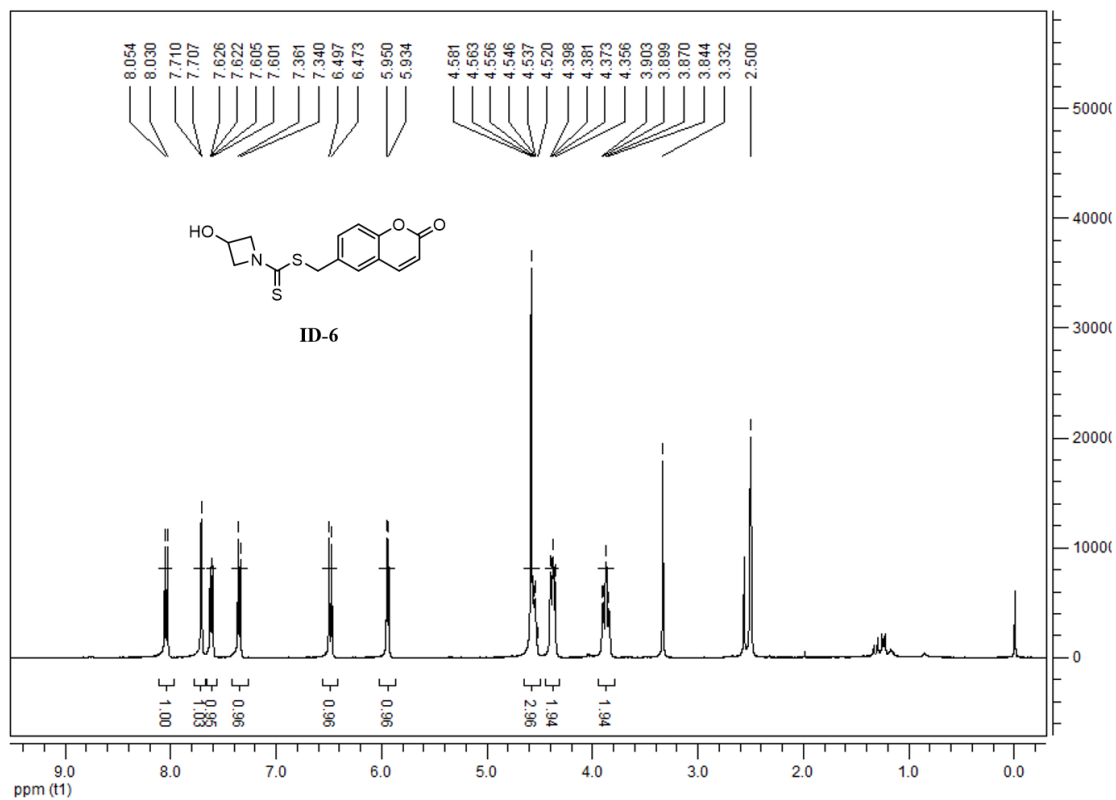

$^{13}\text{C}$  NMR,  $\text{DMSO-}d_6$  (Bruker AVANCE III 400) (**ID-6**)

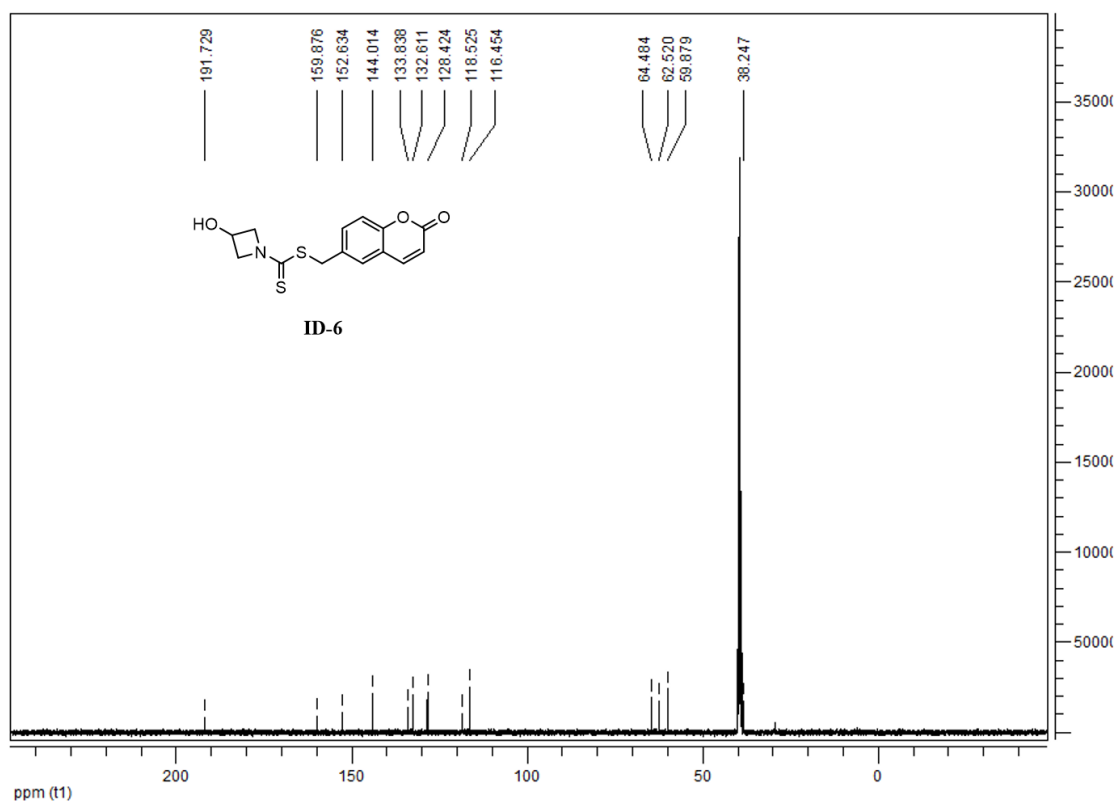

$^1\text{H}$  NMR,  $\text{CDCl}_3$  (Bruker AVANCE III 400) (**ID-7**)

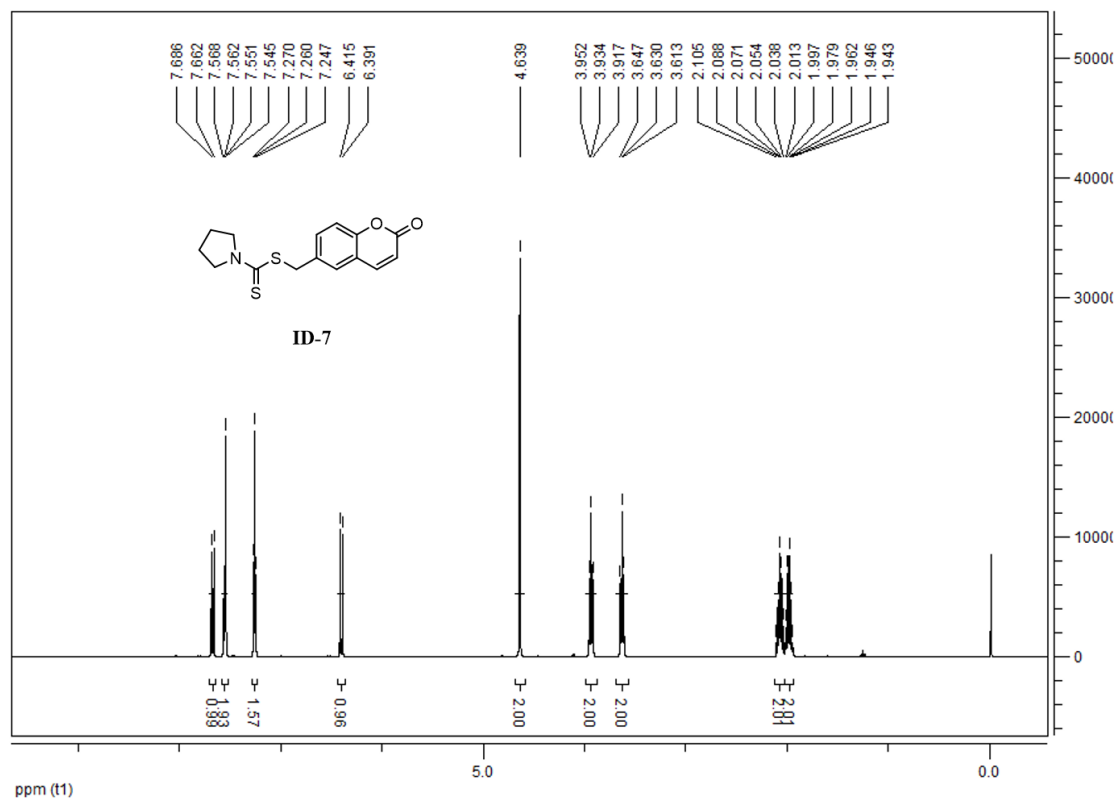



<sup>13</sup>C NMR, CDCl<sub>3</sub> (Bruker AVANCE III 400) (ID-7)

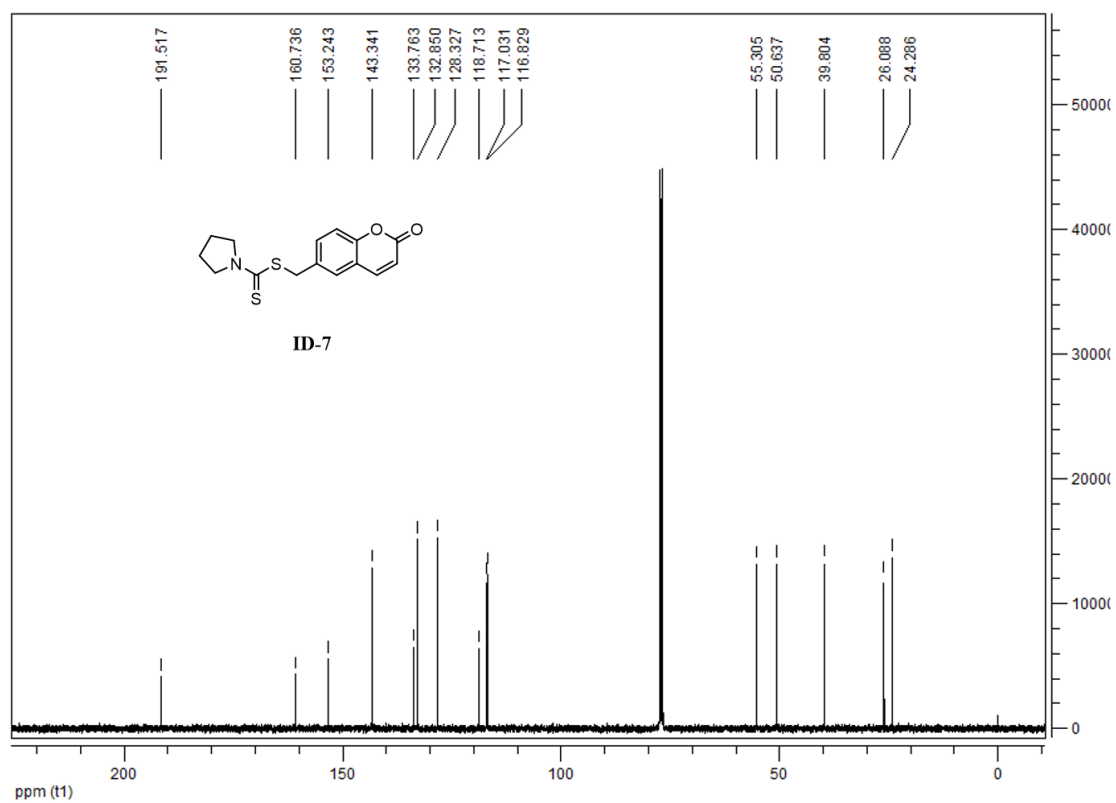

<sup>1</sup>H NMR, CDCl<sub>3</sub> (Bruker AVANCE III 400) (ID-8)

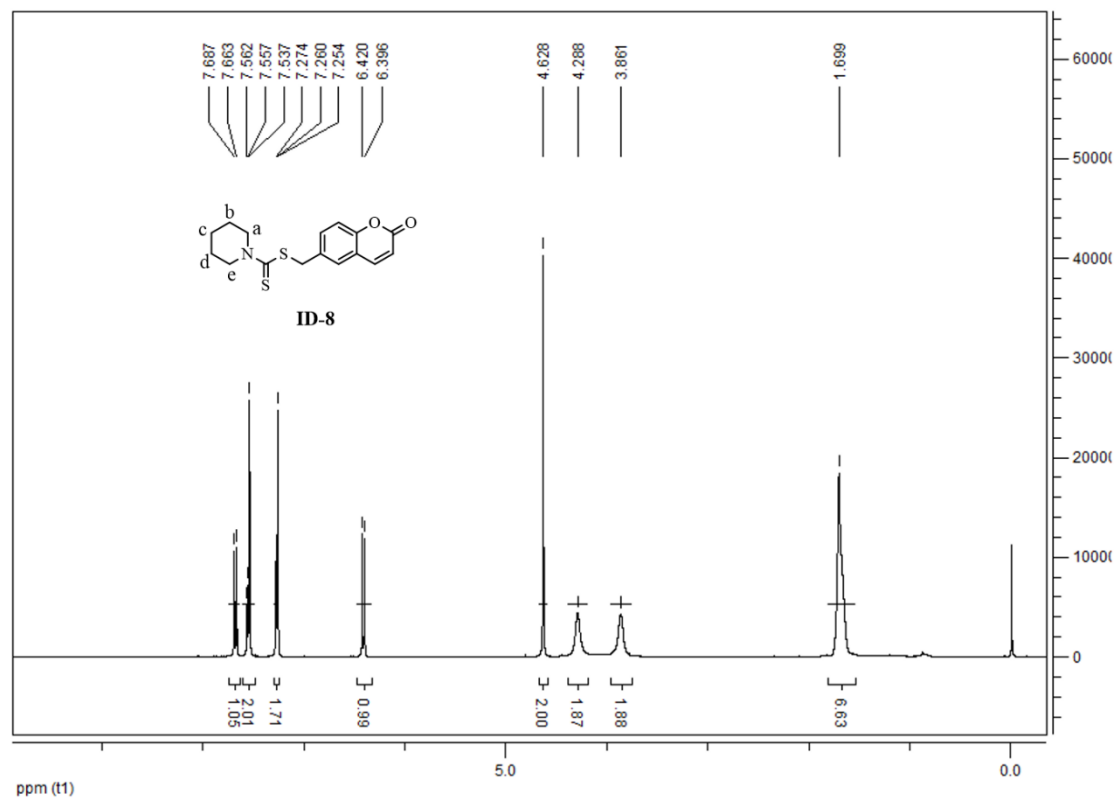

<sup>13</sup>C NMR, CDCl<sub>3</sub> (Bruker AVANCE III 400) (ID-8)

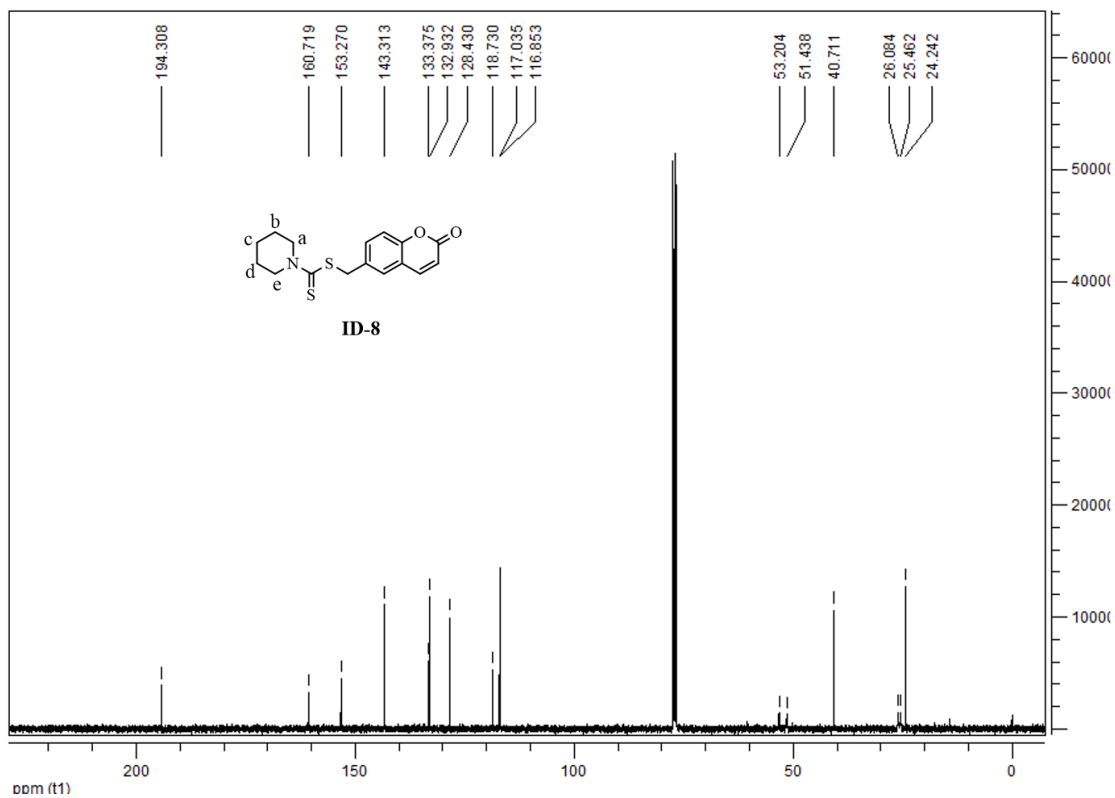

<sup>1</sup>H NMR, CDCl<sub>3</sub> (Bruker AVANCE III 400) (ID-9)

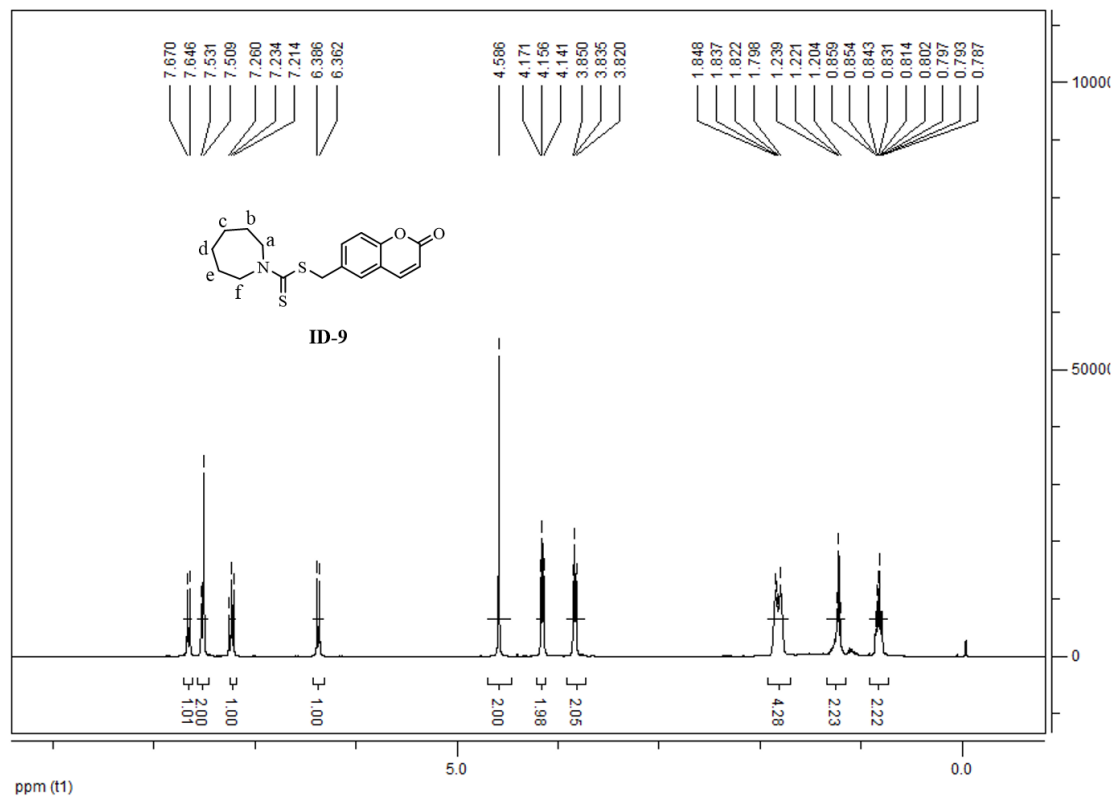

<sup>13</sup>C NMR, CDCl<sub>3</sub> (Bruker AVANCE III 400) (ID-9)

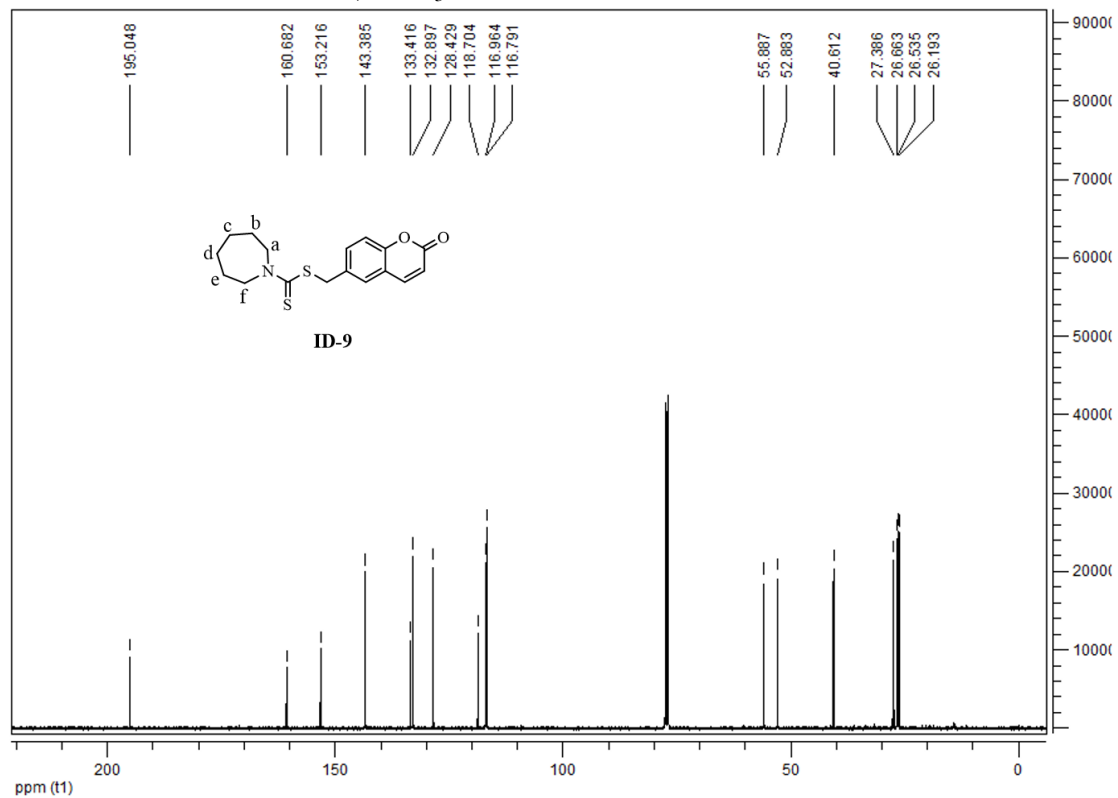

<sup>1</sup>H NMR, DMSO-d<sub>6</sub> (Bruker AVANCE III 600) (ID-10)

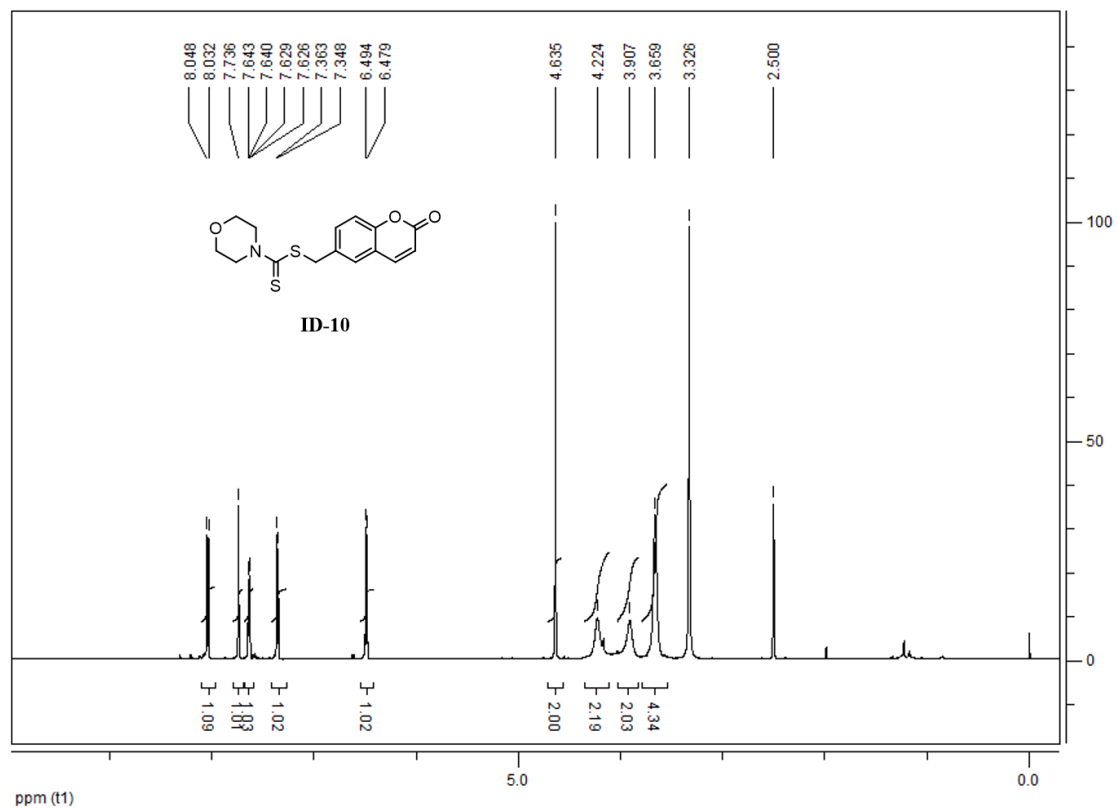

$^{13}\text{C}$  NMR, DMSO- $d_6$  (Bruker AVANCE III 600) (ID-10)

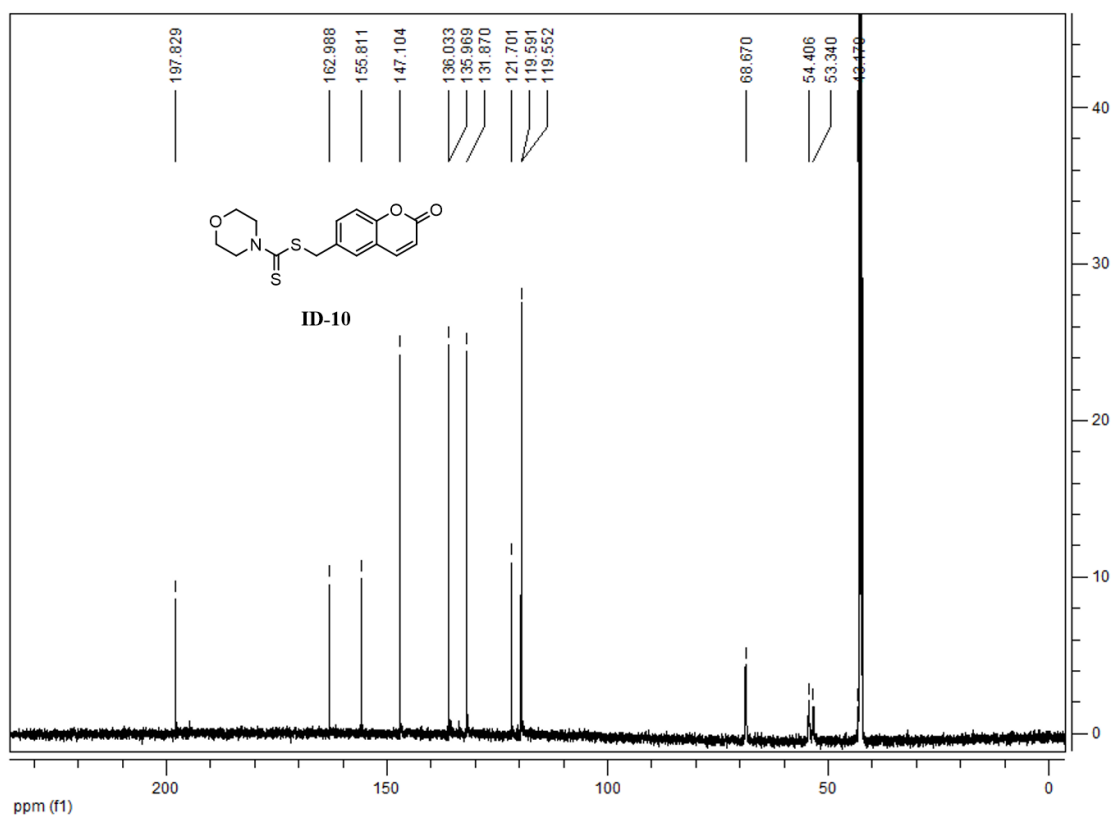

$^1\text{H}$  NMR, DMSO- $d_6$  (Bruker AVANCE III 400) (ID-11)

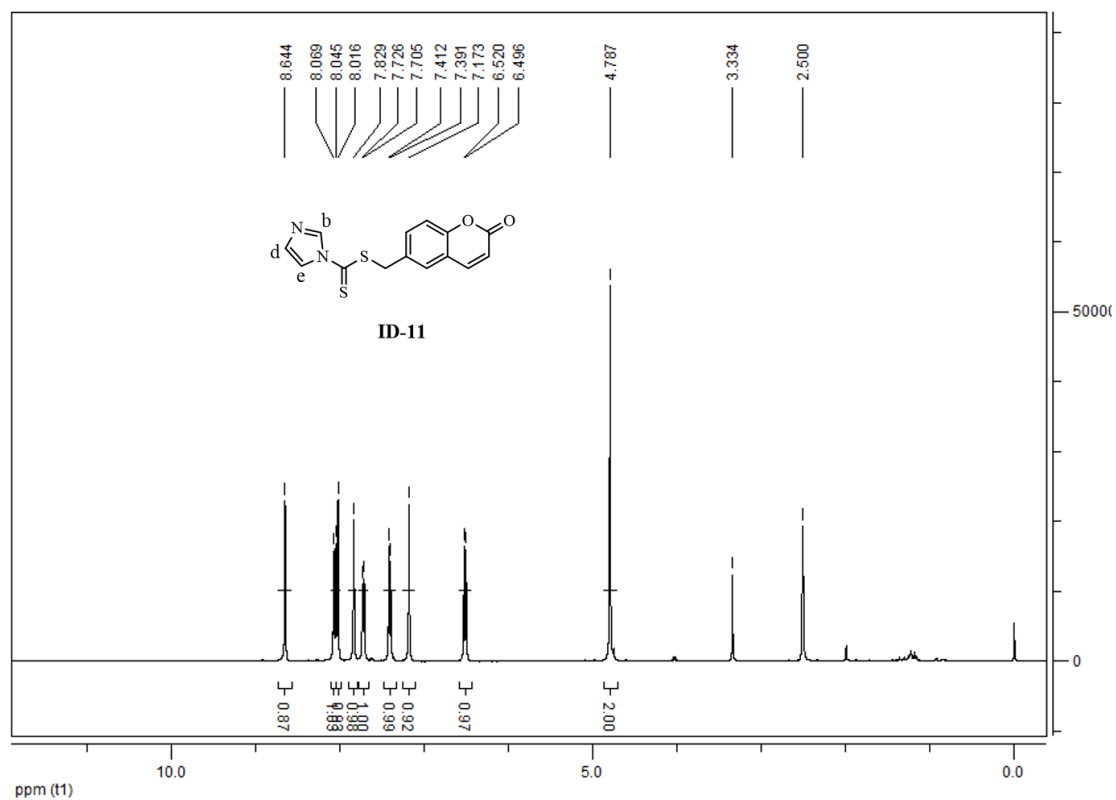

$^{13}\text{C}$  NMR, DMSO- $d_6$  (Bruker AVANCE III 400) (ID-11)

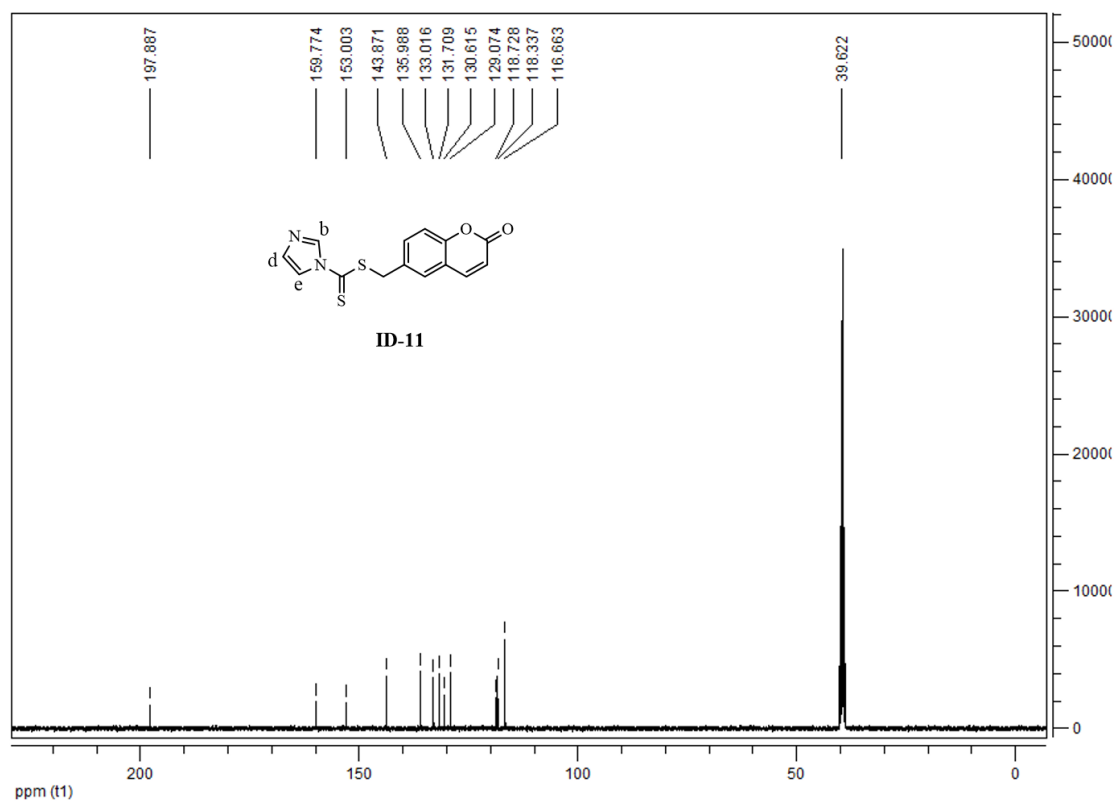

$^1\text{H}$  NMR, DMSO- $d_6$  (Bruker AVANCE III 400) (ID-12)

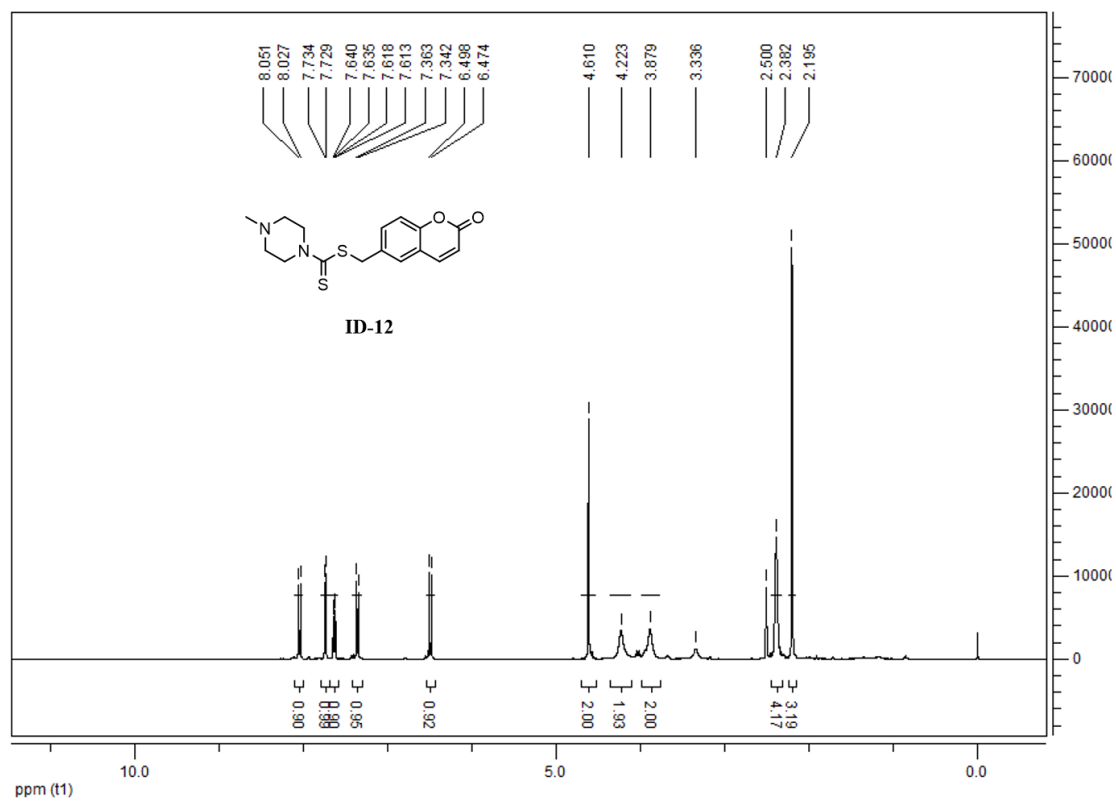

$^{13}\text{C}$  NMR, DMSO- $d_6$  (Bruker AVANCE III 400) (ID-12)

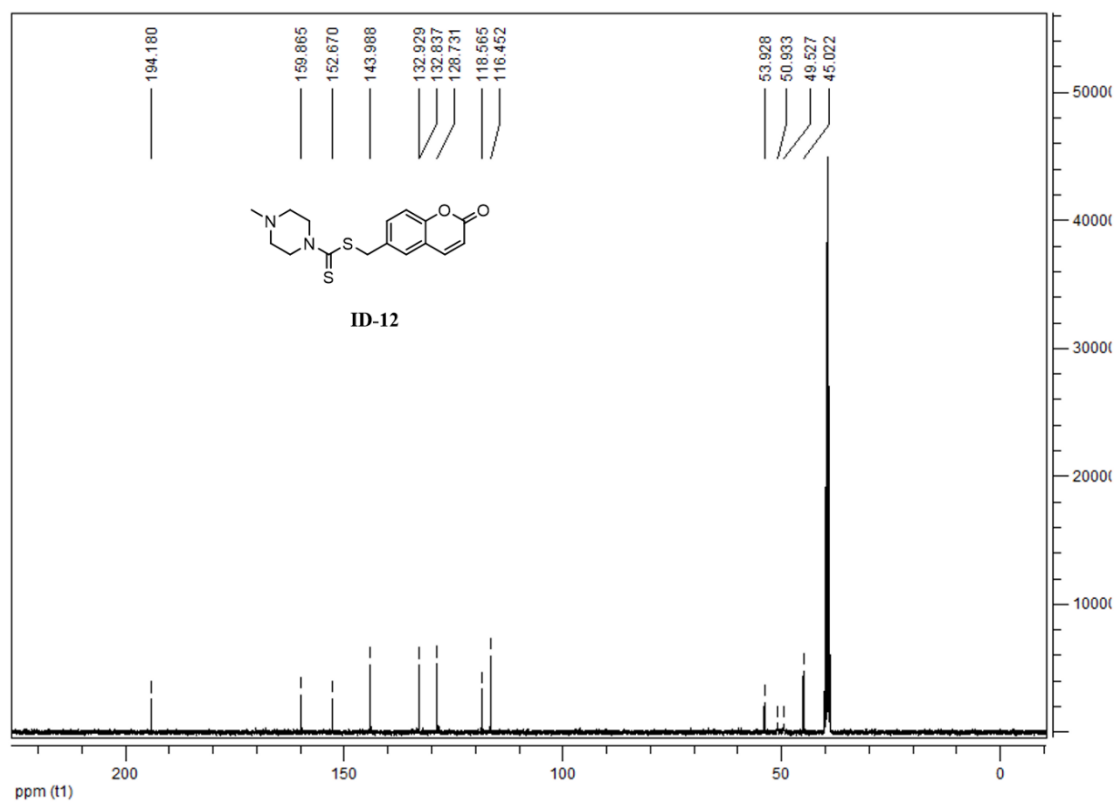

$^1\text{H}$  NMR, DMSO- $d_6$  (Bruker AVANCE III 400) (ID-13)

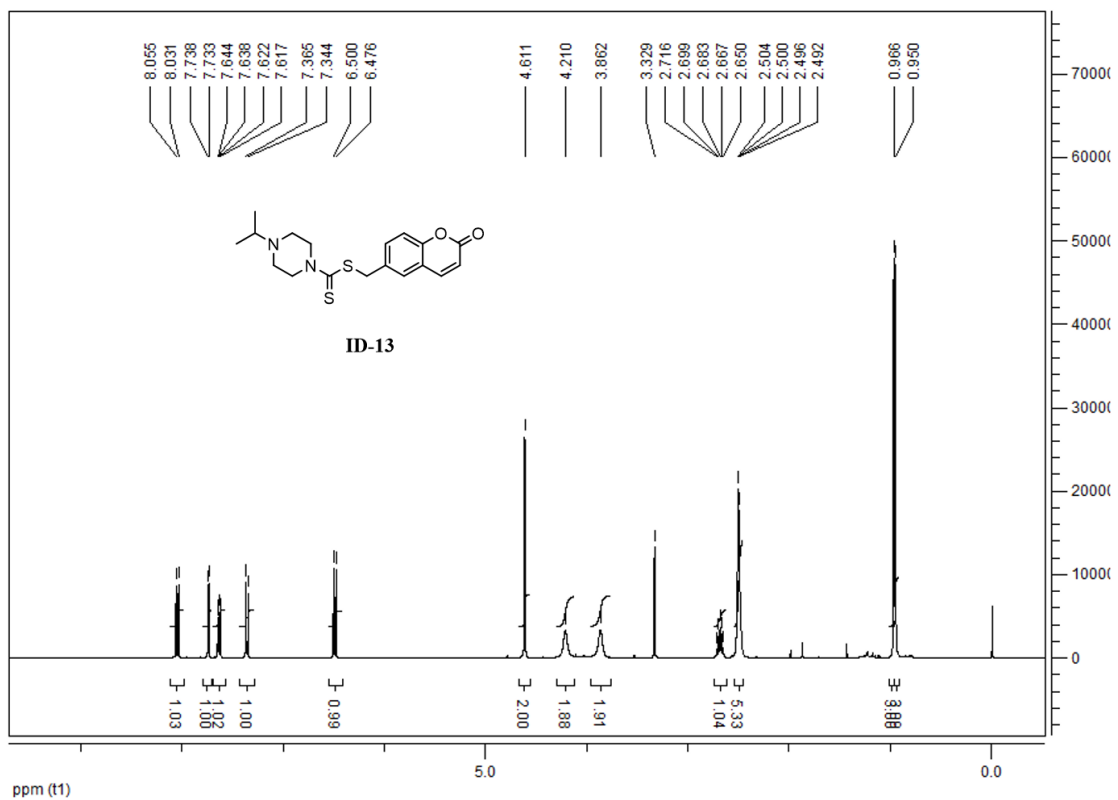

<sup>13</sup>C NMR, DMSO-d<sub>6</sub> (Bruker AVANCE III 400) (ID-13)

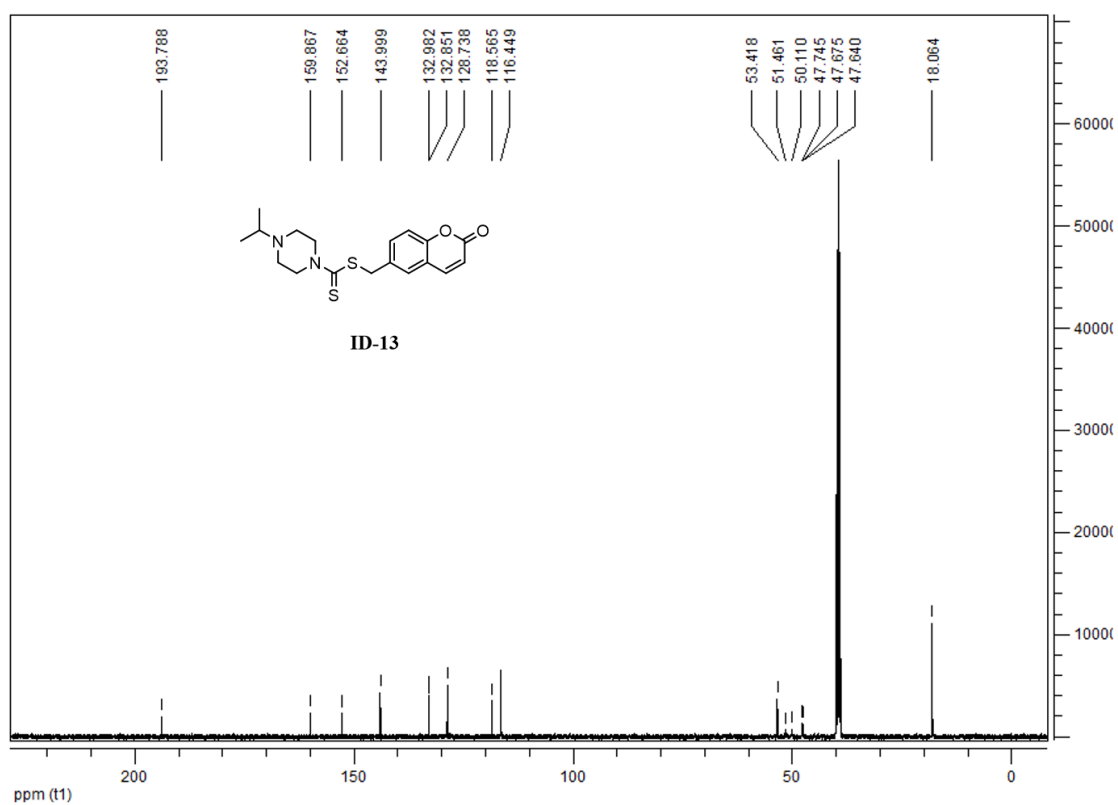

<sup>1</sup>H NMR, DMSO-d<sub>6</sub> (Bruker AVANCE III 400) (ID-14)

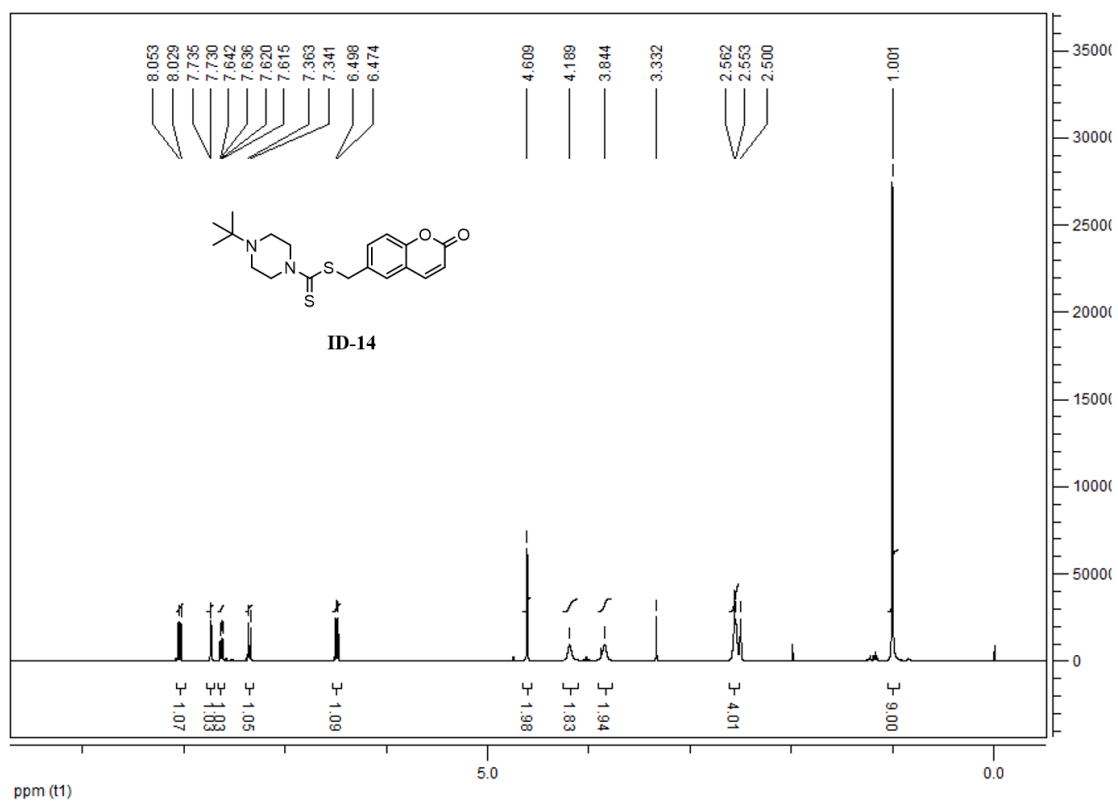

<sup>13</sup>C NMR, DMSO-*d*<sub>6</sub> (Bruker AVANCE III 400) (ID-14)

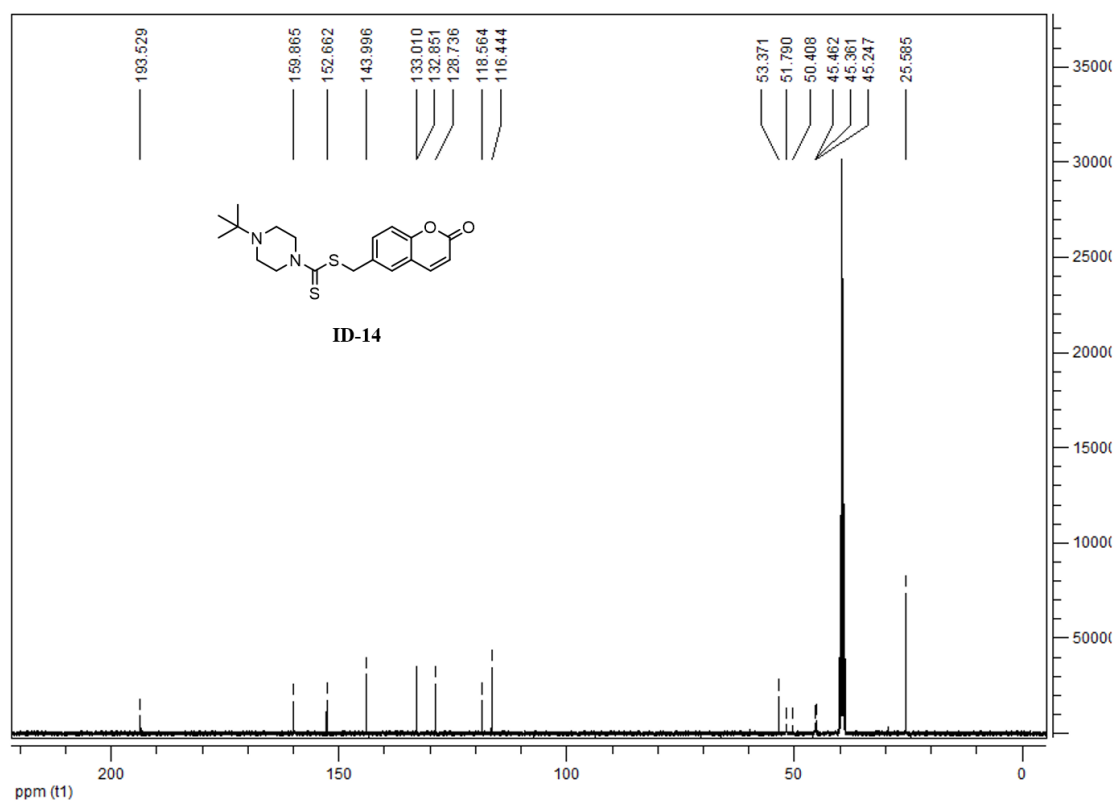

<sup>1</sup>H NMR, DMSO-*d*<sub>6</sub> (Bruker AVANCE III 400) (ID-15)

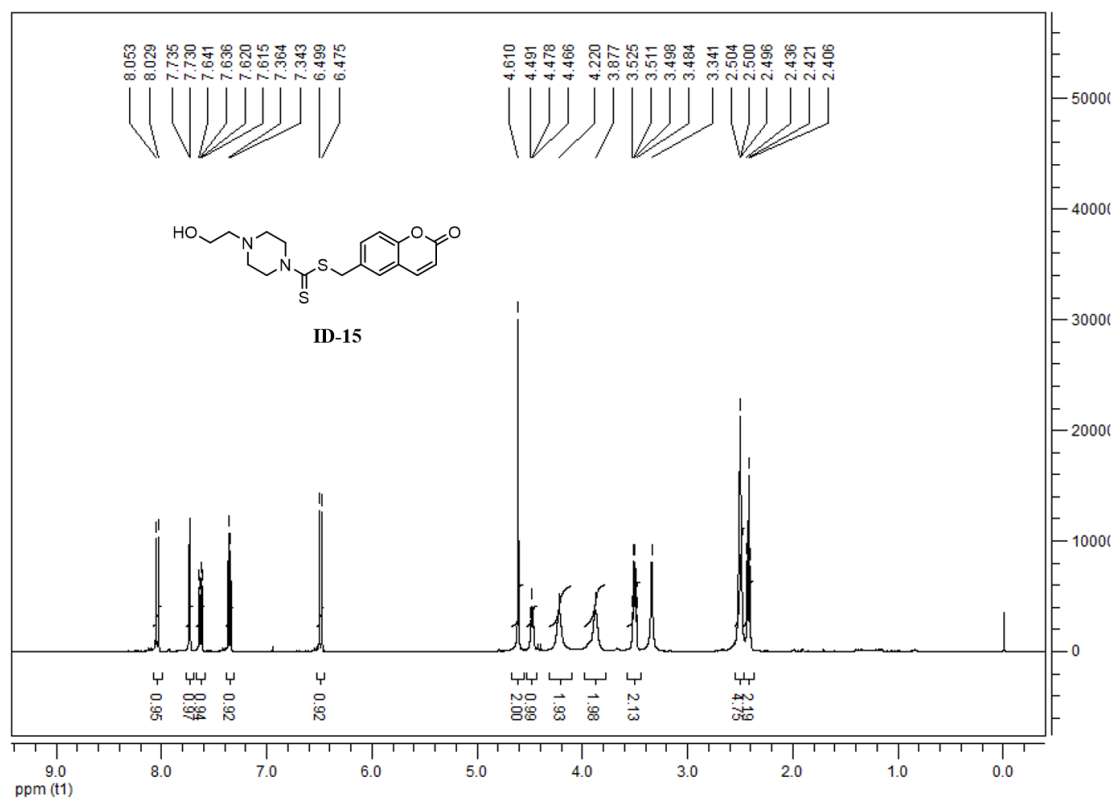



<sup>13</sup>C NMR, DMSO-d<sub>6</sub> (Bruker AVANCE III 400) (ID-15)

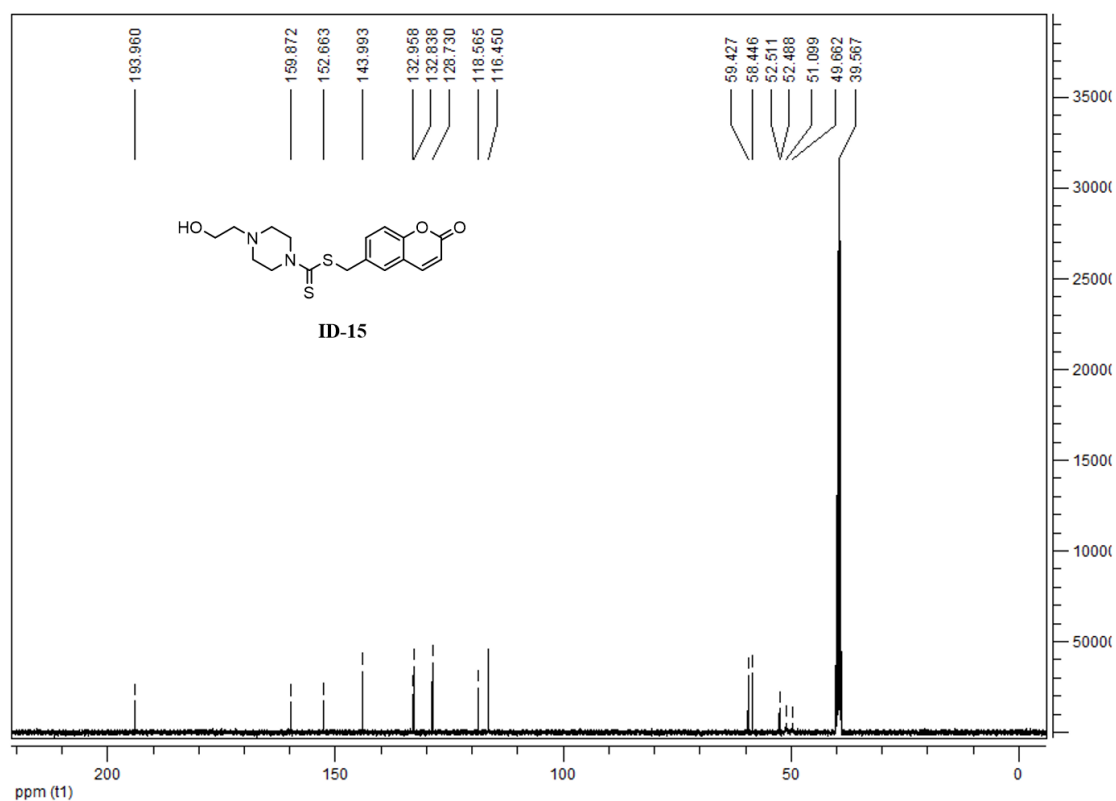

<sup>1</sup>H NMR, DMSO-d<sub>6</sub> (Bruker AVANCE III 400) (ID-16)

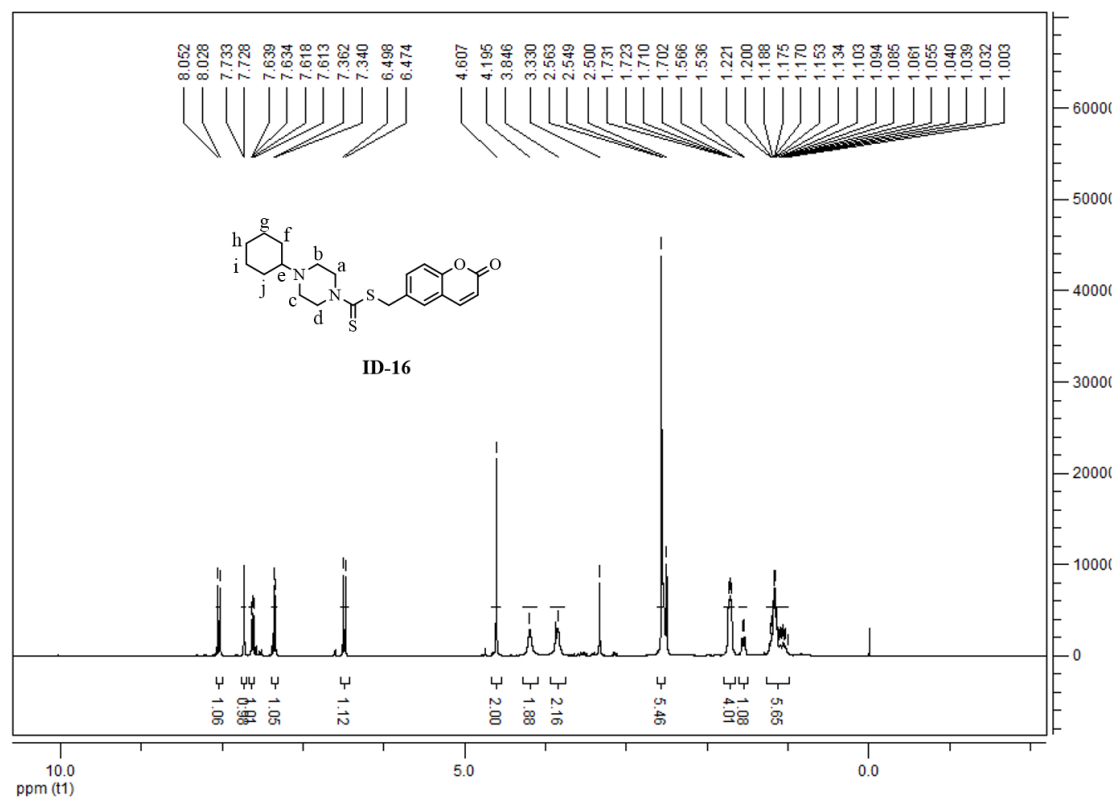

$^{13}\text{C}$  NMR, DMSO- $d_6$  (Bruker AVANCE III 400) (ID-16)

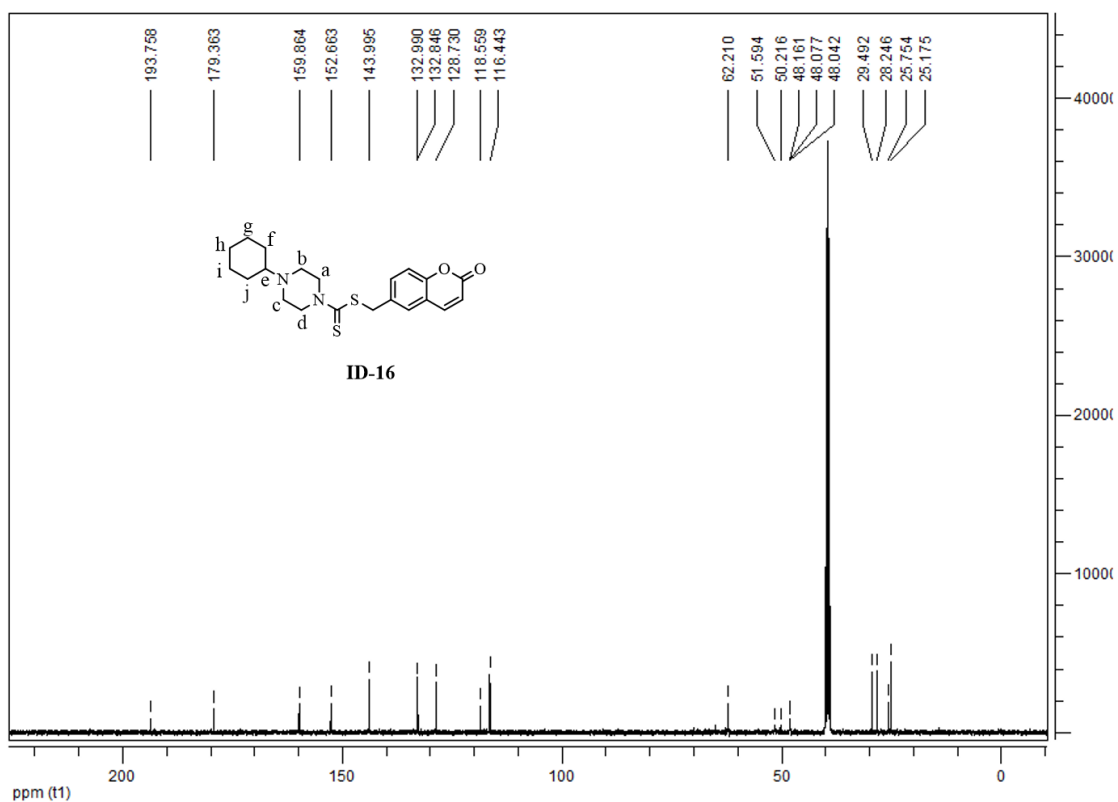

$^1\text{H}$  NMR, DMSO- $d_6$  (Bruker AVANCE III 400) (ID-17)

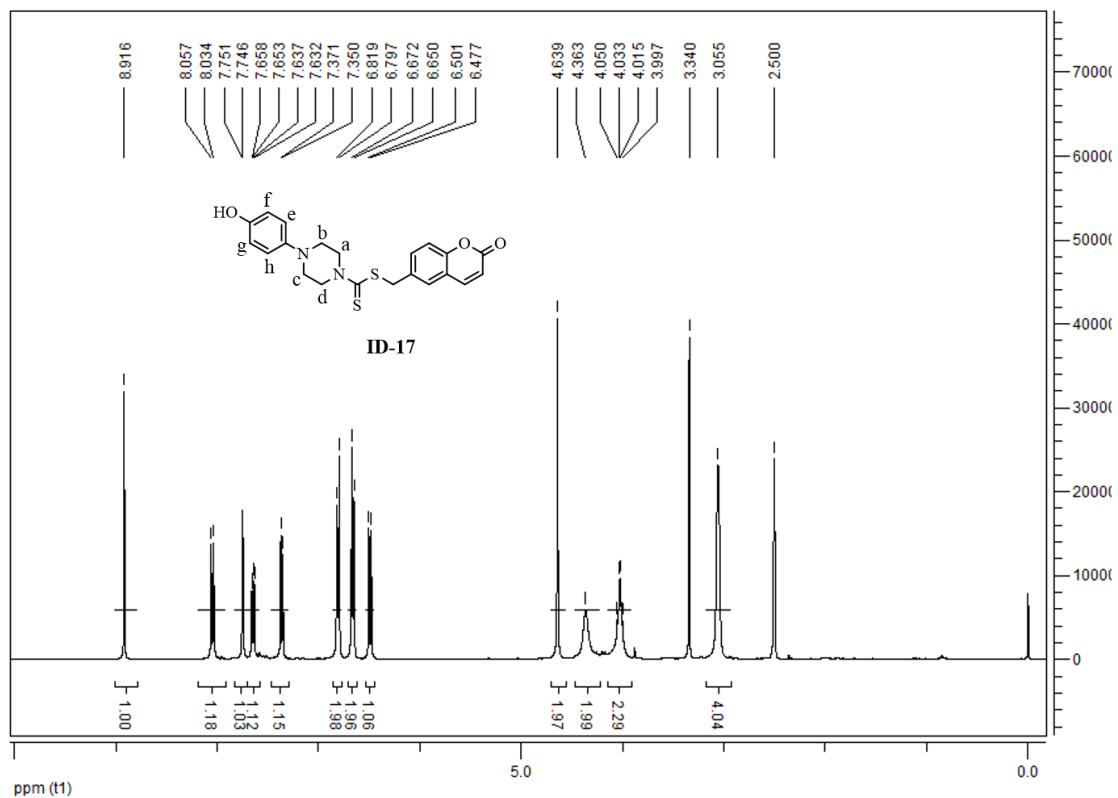

$^{13}\text{C}$  NMR, DMSO- $d_6$  (Bruker AVANCE III 400) (ID-17)

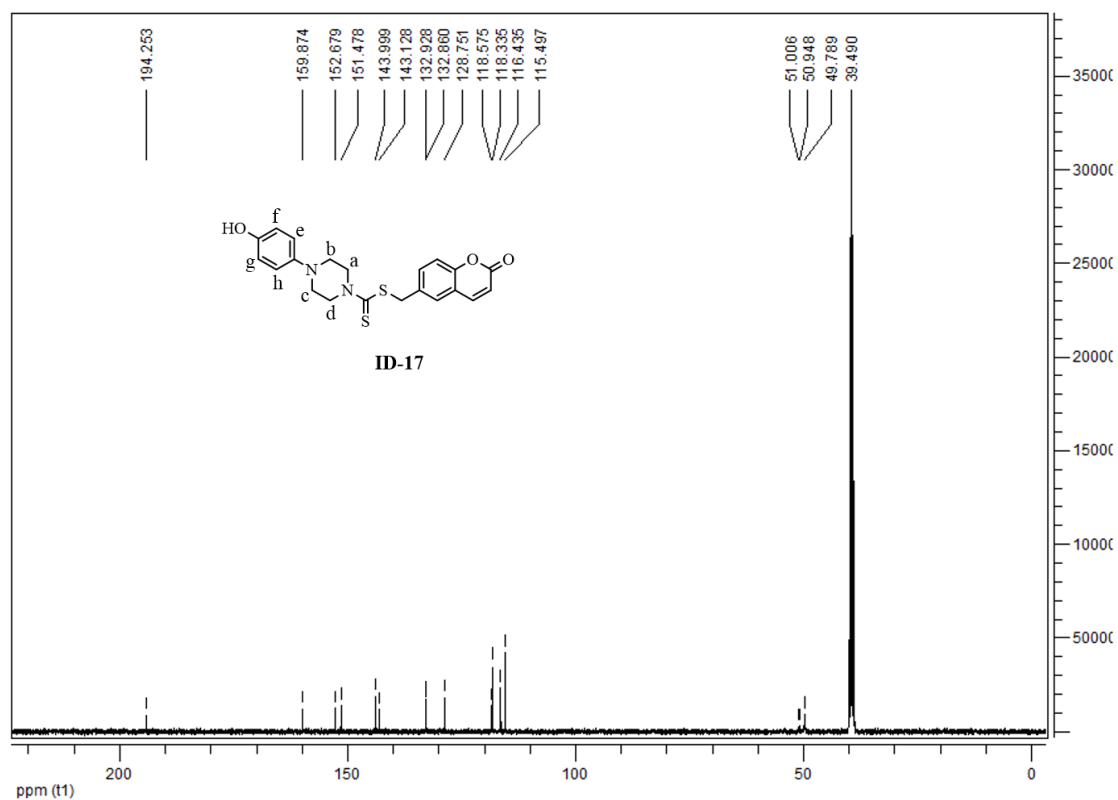

$^1\text{H}$  NMR, DMSO- $d_6$  (Bruker AVANCE III 400) (ID-18)

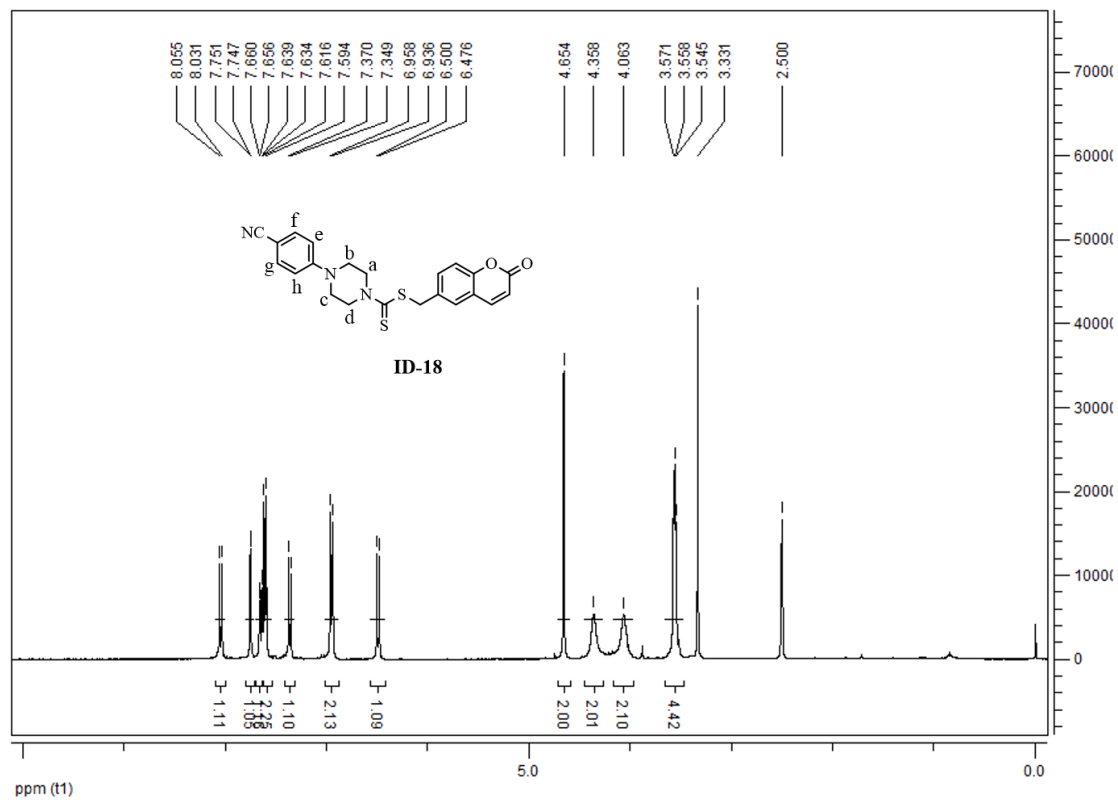

$^{13}\text{C}$  NMR,  $\text{DMSO}-d_6$  (Bruker AVANCE III 400) (ID-18)

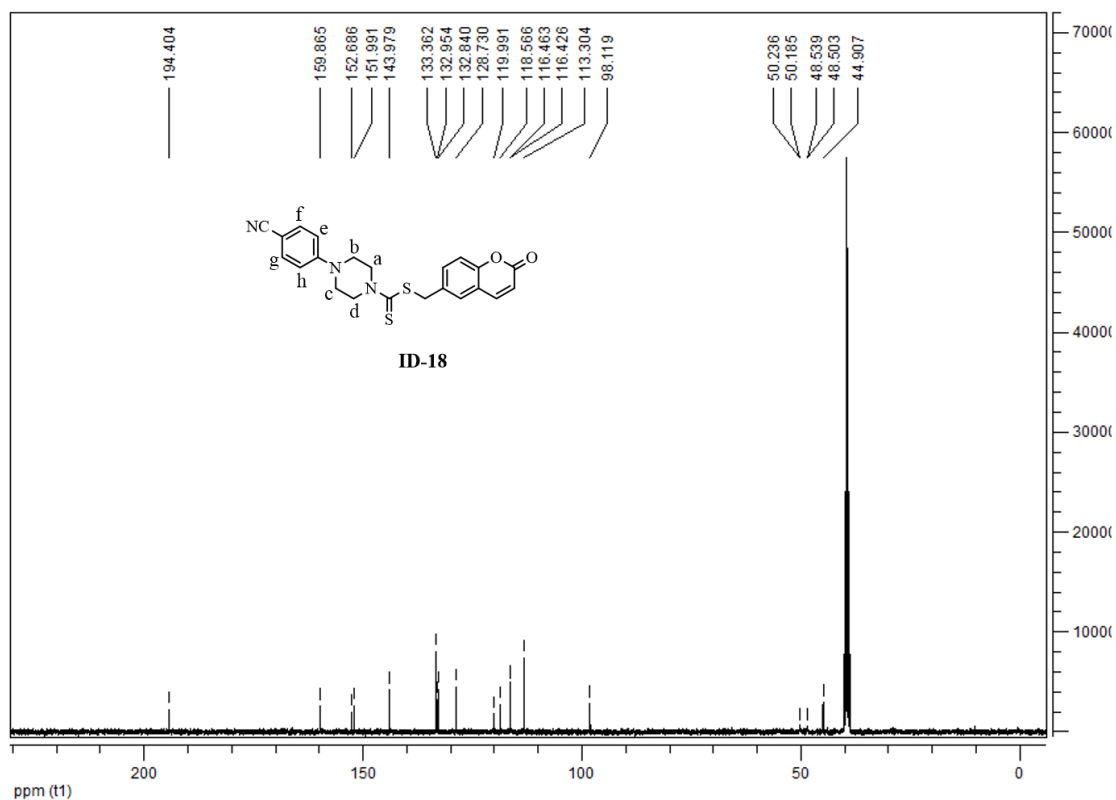

$^1\text{H}$  NMR,  $\text{CDCl}_3$  (Bruker AVANCE III 400) (ID-19)

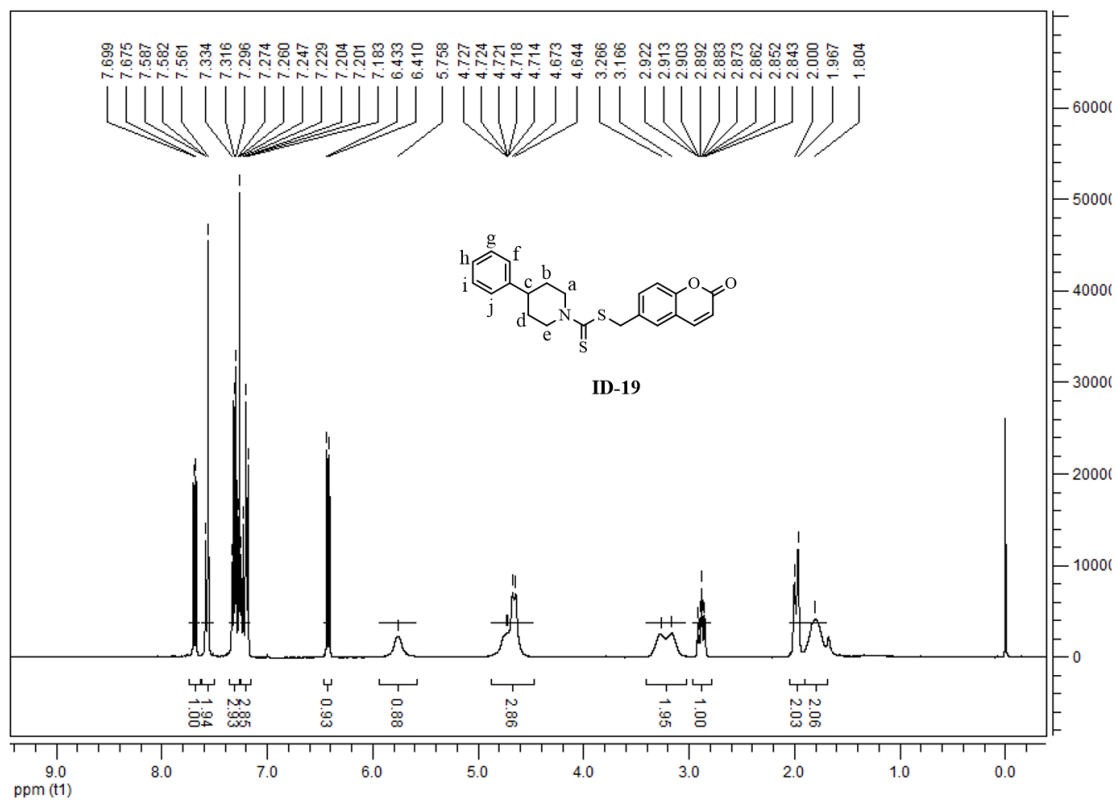

<sup>13</sup>C NMR, CDCl<sub>3</sub> (Bruker AVANCE III 400) (ID-19)

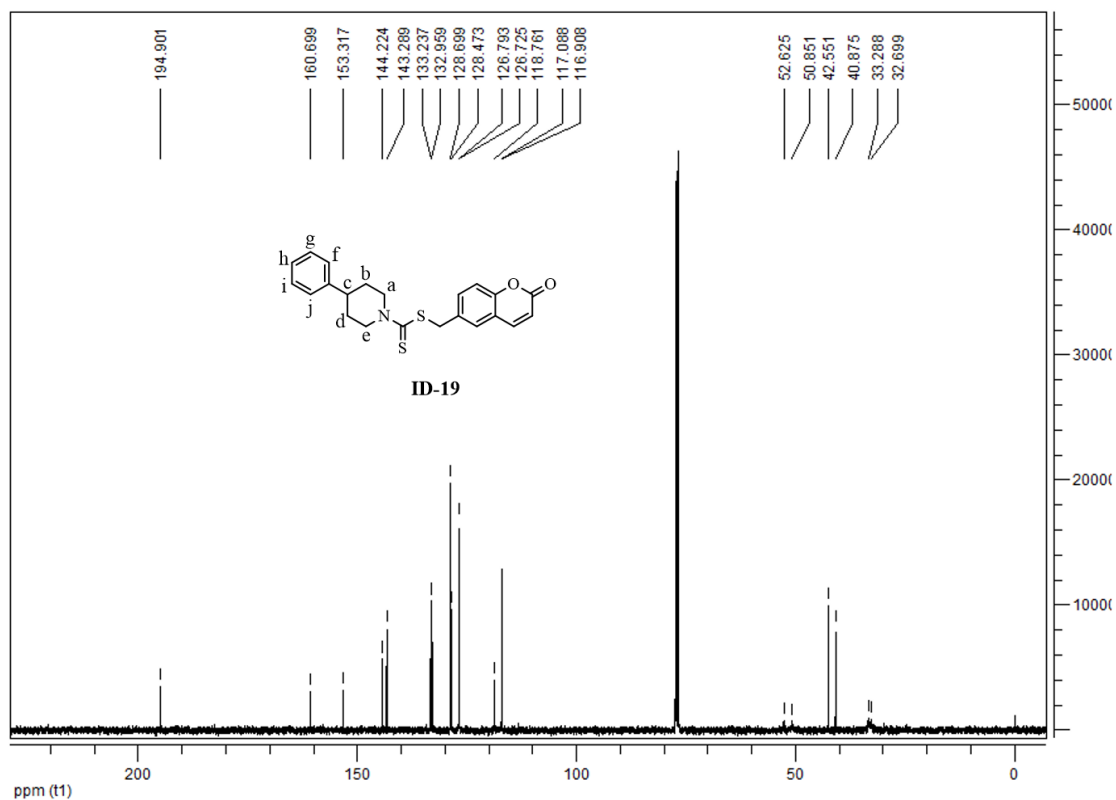

<sup>1</sup>H NMR, DMSO-d<sub>6</sub> (Bruker AVANCE III 400) (ID-20)

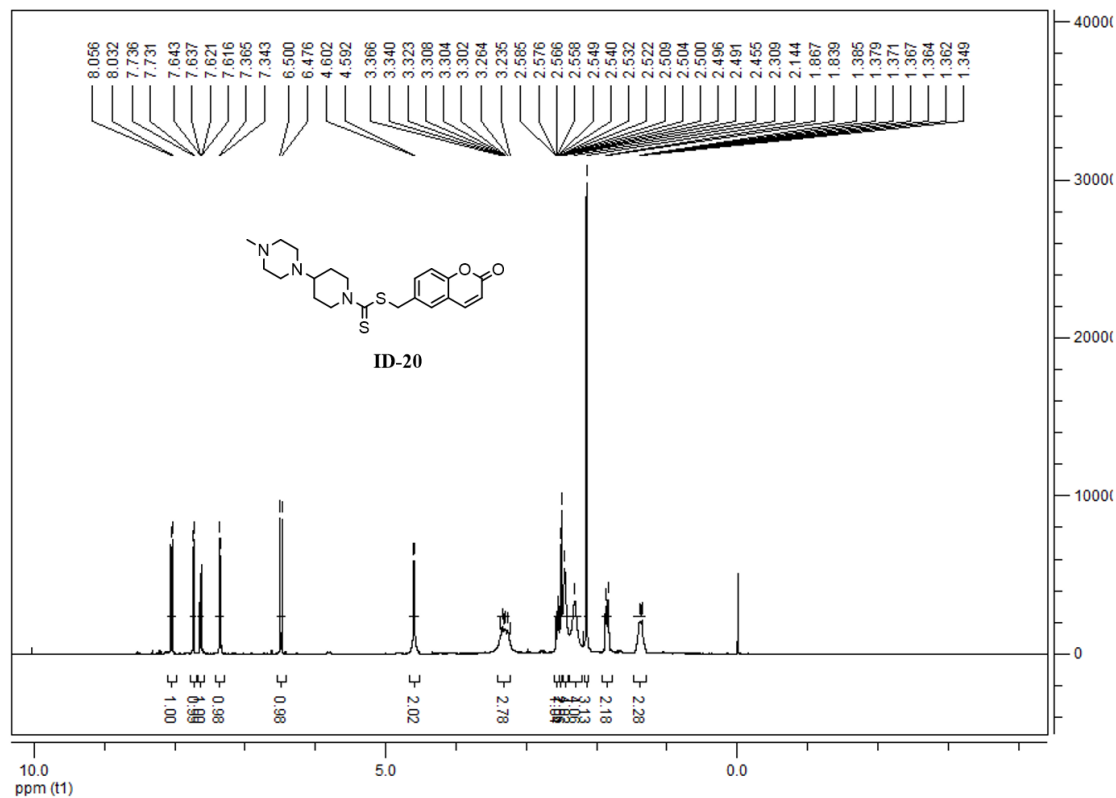

$^{13}\text{C}$  NMR, DMSO- $d_6$  (Bruker AVANCE III 400) (**ID-20**)

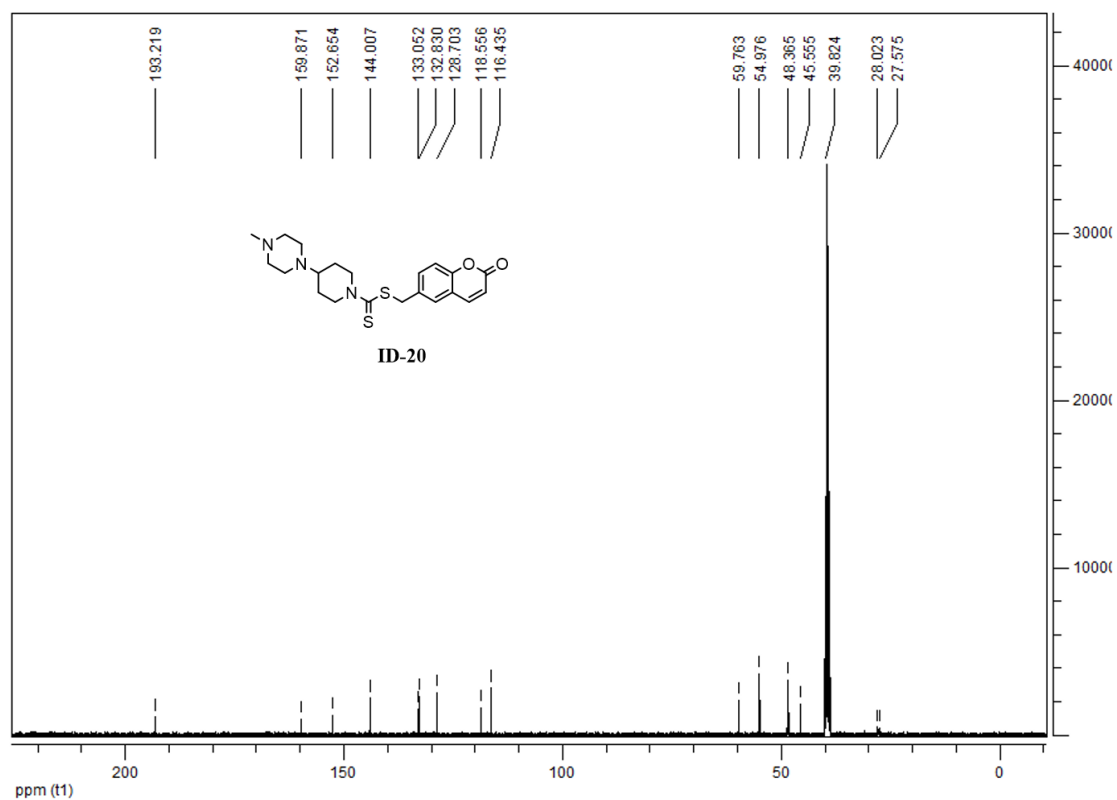

**(ID-1)**: HRMS (ESI,  $m/z$ ) calcd. for  $\text{C}_{13}\text{H}_{13}\text{NO}_2\text{S}_2$  ( $\text{M}+\text{Na}$ ) $^+$  302.0280, found 302.0282.

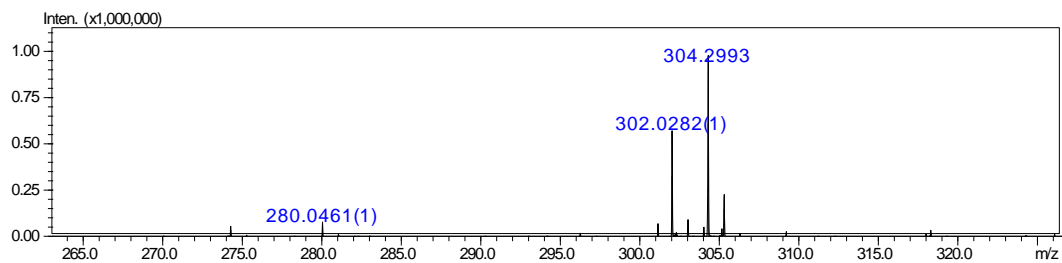

**(ID-2)**: HRMS (ESI,  $m/z$ ) calcd. for  $\text{C}_{15}\text{H}_{17}\text{NO}_2\text{S}_2$  ( $\text{M}+\text{Na}$ ) $^+$  330.0593, found 330.0599.

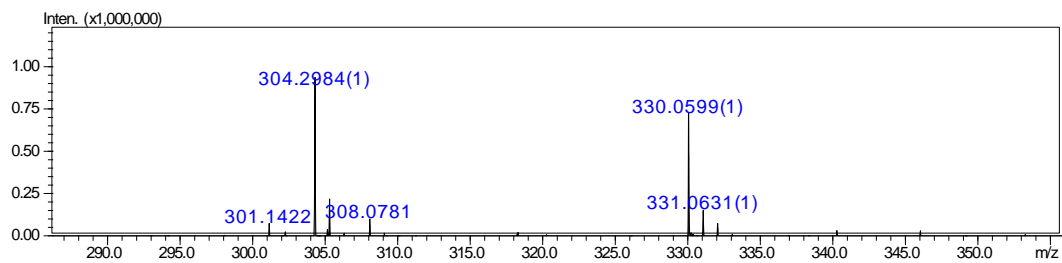

**(ID-3)**: HRMS (ESI,  $m/z$ ) calcd. for  $\text{C}_{17}\text{H}_{21}\text{NO}_2\text{S}_2$  ( $\text{M}+\text{Na}$ ) $^+$  358.0906, found 358.0918.

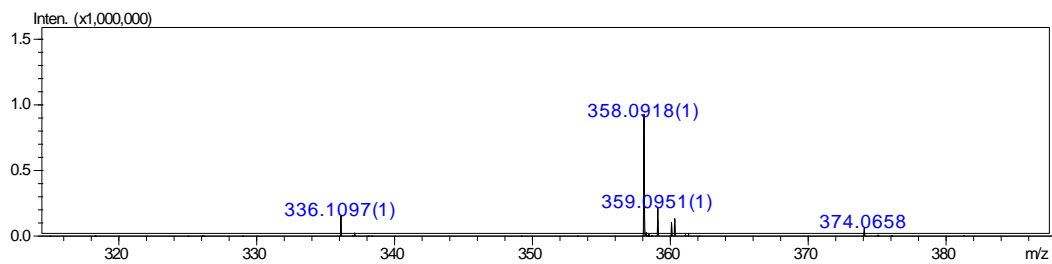

**(ID-4):** HRMS (ESI,  $m/z$ ) calcd. for  $C_{19}H_{25}NO_2S_2$  ( $M+Na$ )<sup>+</sup> 386.1219, found 386.1222.

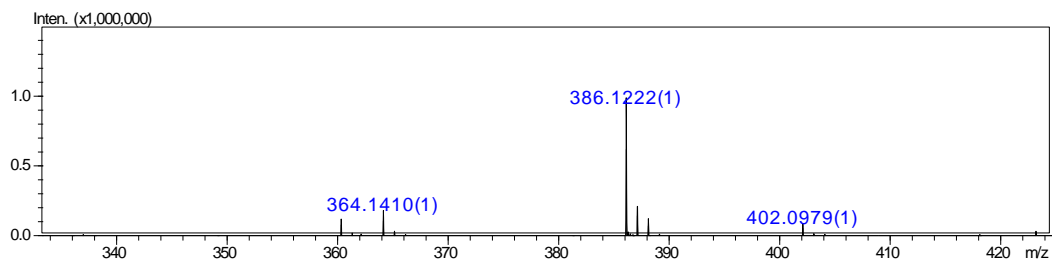

**(ID-5):** HRMS (ESI,  $m/z$ ) calcd. for  $C_{14}H_{13}NO_2S_2$  ( $M+Na$ )<sup>+</sup> 314.0280, found 314.0281.

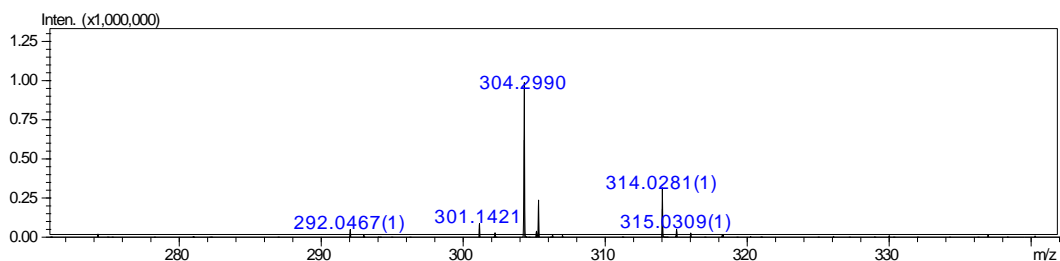

**(ID-6):** HRMS (ESI,  $m/z$ ) calcd. for  $C_{14}H_{13}NO_3S_2$  ( $M+Na$ )<sup>+</sup> 330.0229, found 330.0232.

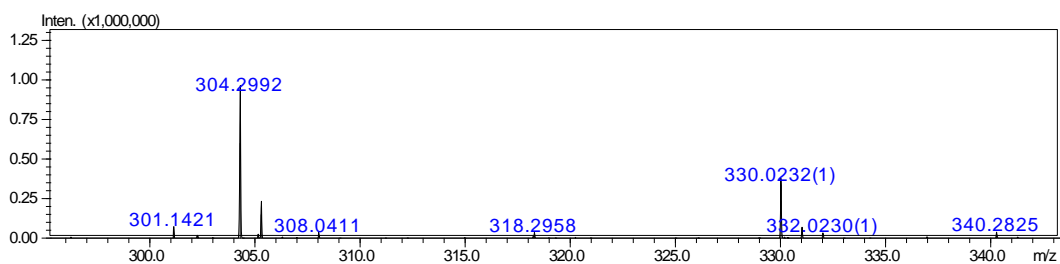

**(ID-7):** HRMS (ESI,  $m/z$ ) calcd. for  $C_{15}H_{15}NO_2S_2$  ( $M+Na$ )<sup>+</sup> 328.0436, found 328.0444.

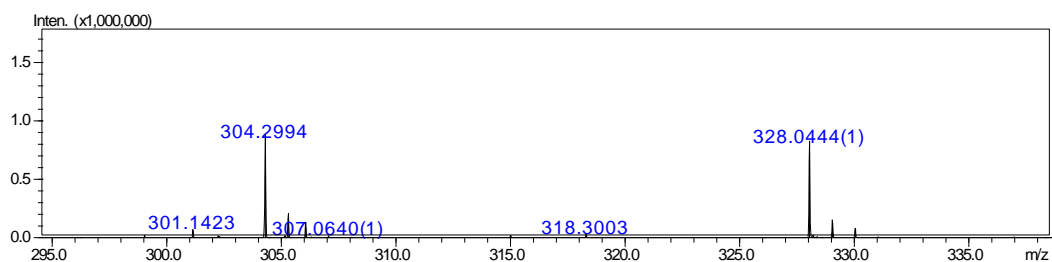

**(ID-8):** HRMS (ESI,  $m/z$ ) calcd. for  $C_{16}H_{17}NO_2S_2$  ( $M+Na$ )<sup>+</sup> 342.0593, found 342.0585.

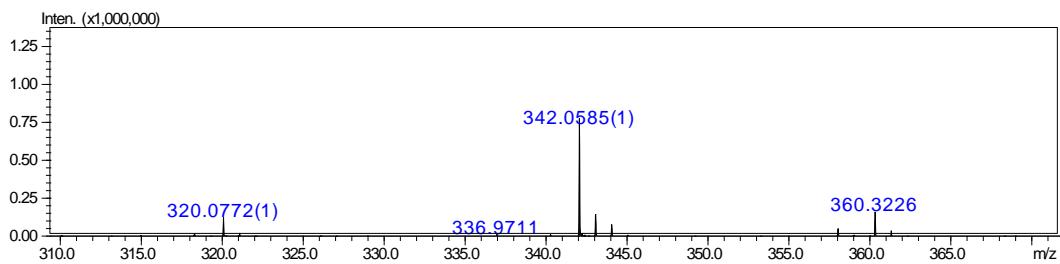

**(ID-9):** HRMS (ESI,  $m/z$ ) calcd. for  $C_{17}H_{19}NO_2S_2$  ( $M+Na$ )<sup>+</sup> 356.0749, found 356.0751.

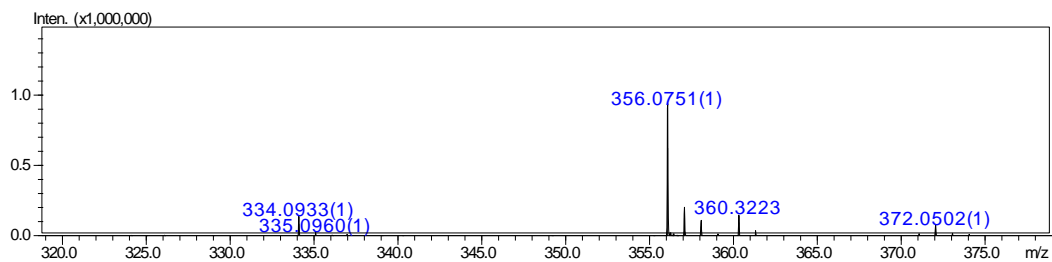

**(ID-10):** HRMS (ESI,  $m/z$ ) calcd. for  $C_{15}H_{15}NO_3S_2$  ( $M+Na$ )<sup>+</sup> 344.0386, found 344.0391.

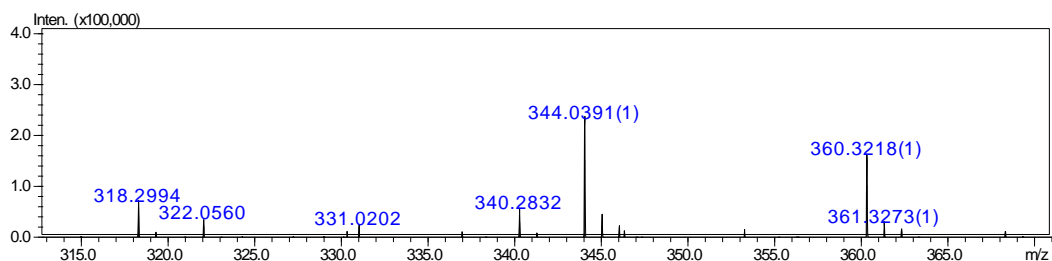

**(ID-11):** HRMS (ESI,  $m/z$ ) calcd. for  $C_{14}H_{10}N_2O_2S_2$  ( $M+Na$ )<sup>+</sup> 325.0076, found 325.0070.

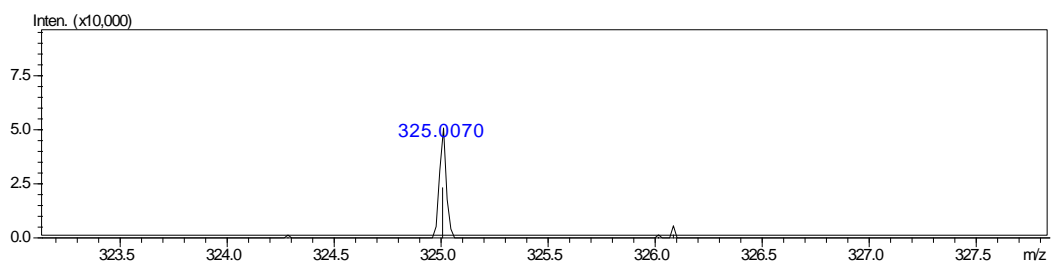

**(ID-12):** HRMS (ESI,  $m/z$ ) calcd. for  $C_{16}H_{18}N_2O_2S_2$  ( $M+Na$ )<sup>+</sup> 357.0702, found 357.0709.

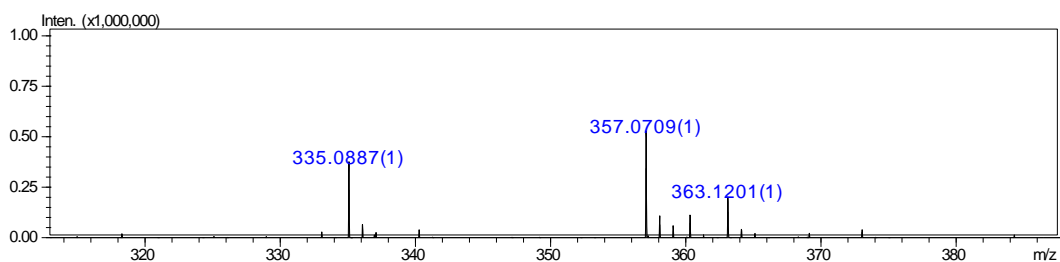

**(ID-13):** HRMS (ESI,  $m/z$ ) calcd. for  $C_{18}H_{22}N_2O_2S_2$  ( $M+H$ )<sup>+</sup> 363.1195, found 363.1201.



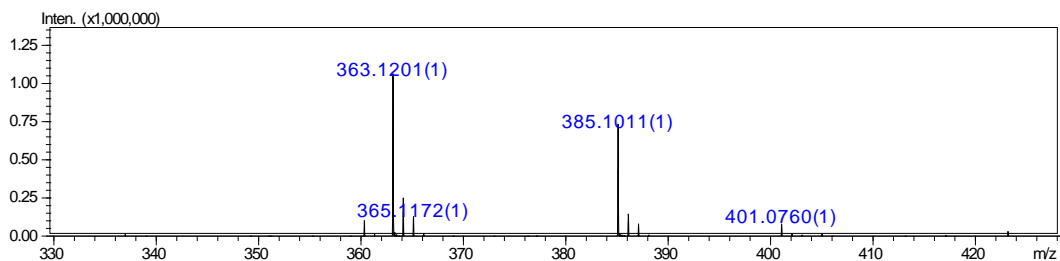

(ID-14): HRMS (ESI,  $m/z$ ) calcd. for  $C_{19}H_{24}N_2O_2S_2$  ( $M+H$ )<sup>+</sup> 377.1352, found 377.1349.

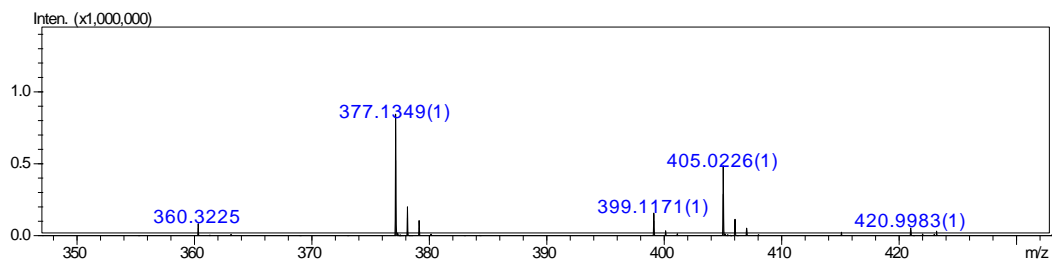

(ID-15): HRMS (ESI,  $m/z$ ) calcd. for  $C_{17}H_{20}N_2O_3S_2$  ( $M+Na$ )<sup>+</sup> 387.0808, found 387.0808.

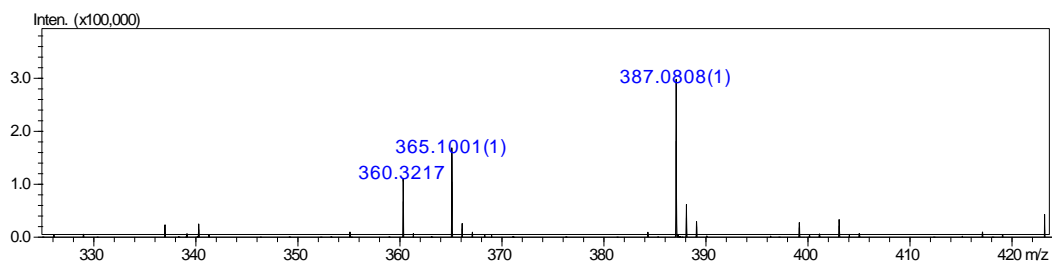

(ID-16): HRMS (ESI,  $m/z$ ) calcd. for  $C_{21}H_{26}N_2O_2S_2$  ( $M+H$ )<sup>+</sup> 403.1508, found 403.1509.

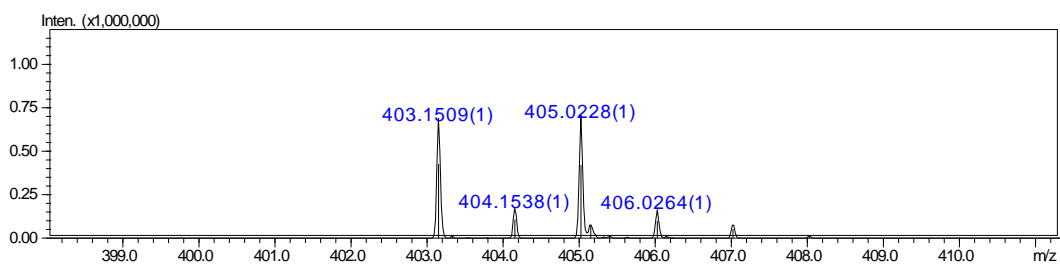

(ID-17): HRMS (ESI,  $m/z$ ) calcd. for  $C_{21}H_{20}N_2O_3S_2$  ( $M-H$ )<sup>-</sup> 411.0843, found 411.0860.

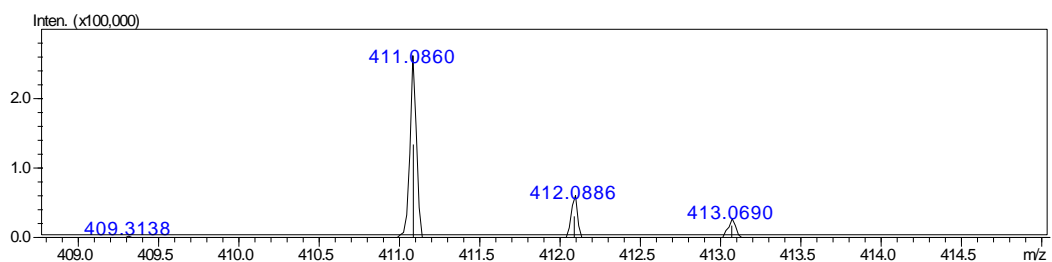

(ID-18): HRMS (ESI,  $m/z$ ) calcd. for  $C_{22}H_{19}N_3O_2S_2$  ( $M+Na$ )<sup>+</sup> 444.0811, found 444.0827.

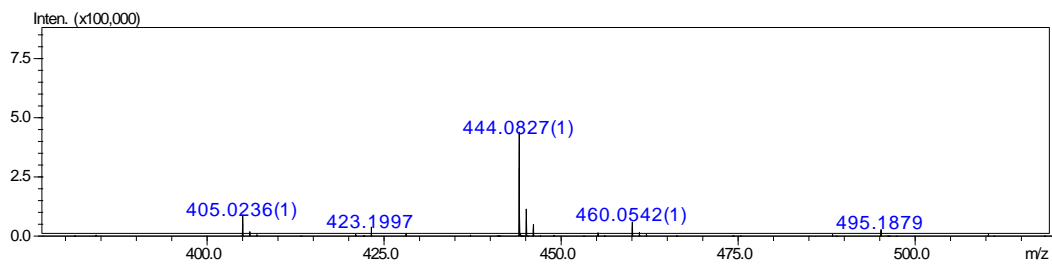

**(ID-19):** HRMS (ESI,  $m/z$ ) calcd. for  $C_{22}H_{21}NO_2S_2$  ( $M+Na$ )<sup>+</sup> 418.0906, found 418.0910.

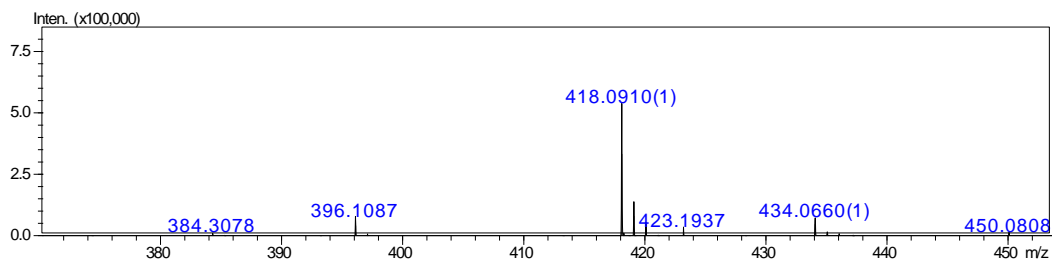

**(ID-20):** HRMS (ESI,  $m/z$ ) calcd. for  $C_{21}H_{27}N_3O_2S_2$  ( $M+H$ )<sup>+</sup> 418.1617, found 418.1630.

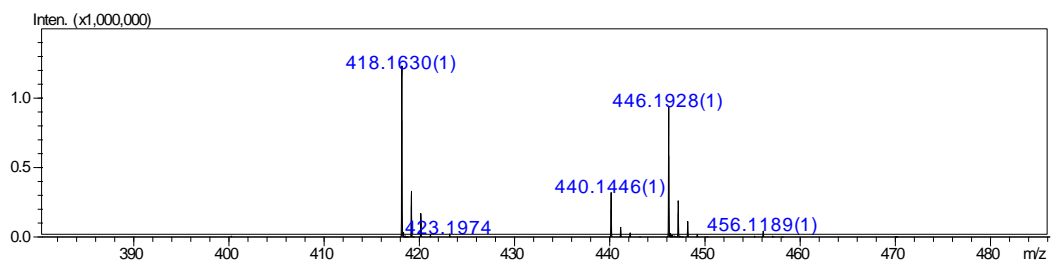

Supplement: IENZ_A_1875458_SM2562.pdf [file IENZ_A_1875458_SM2562.pdf]
